# Supplementary material for: Cu-catalyzed cyclization to construct indoles fromN-(ortho-chloromethyl)aryl carbamates and terminal alkynesviaa one-pot reaction
Source: Royal Society of Chemistry journal article supplement (doi:10.1039/d0nj01981j), 2020-01-01

## Supporting Information

### Content

|                                                                                                              |    |
|--------------------------------------------------------------------------------------------------------------|----|
| <b>1 General Information</b> .....                                                                           | 1  |
| <b>2 General procedure for preparation of N-(ortho-chloromethyl)aryl amides</b> .....                        | 2  |
| <b>3 General Procedure A for the [4+1]-cycloaddition of <i>O</i>-aminobenzyl chloride with alkyne:</b> ..... | 2  |
| <b>4 The experimental results</b> .....                                                                      | 3  |
| <b>Optimization of reaction conditions (Table 1)</b> .....                                                   | 3  |
| <b>Scheme 1. Substrate Scope 1</b> .....                                                                     | 3  |
| <b>Scheme 2. Substrate Scope 2</b> .....                                                                     | 4  |
| <b>Scheme 3. Gram scale experiment and product derivation</b> .....                                          | 5  |
| <b>5 Structural characterization</b> .....                                                                   | 5  |
| <b>6 Original spectrogram</b> .....                                                                          | 10 |
| <b>7 X-Ray crystal data of 3a and the intermediate 2a</b> .....                                              | 35 |
| <b>8 A Plausible Reaction Mechanism</b> .....                                                                | 36 |

### 1 General Information

All reactions were carried out under an atmosphere of nitrogen in oven-dried glassware with magnetic stirring, unless otherwise specified. Dichloromethane was purified by passage through a bed of activated alumina. All other reagents and solvents were purchased from Energy Chemical or J&K Chemical Company and used without any further purification. TLC information was recorded on GF 254 plates (Qingdao Haiyang Chemical Co. Ltd., P. R. China) and developed by staining with KMnO<sub>4</sub> or ceric ammonium molybdate (CAM). Purification of reaction products were carried out by flash chromatography with silica gel (200-300 mesh, Qingdao Haiyang Chemical Co. Ltd., P. R. China). Melting points were measured with X-4 digital display micro-melting point detector. <sup>1</sup>H NMR spectra were measured on Varian 400 (400 MHz) spectrometers and reported in ppm (s = singlet, d = doublet, t = triplet, q = quartet, m = multiplet, br = broad; integration; coupling constant(s) in Hz), using TMS as an internal standard (TMS at 0.00 ppm) in CDCl<sub>3</sub>. <sup>13</sup>C NMR spectra were recorded on V400 spectrometer and reported in ppm using solvent as an internal standard (CDCl<sub>3</sub> at 77.16 ppm). High-resolution mass spectra were obtained using an Agilent 6230 TOF LC/MS with an (atmospheric pressure photo-ionization (APPI) or electrospray (ESI) source with purine and HP-0921 as an internal calibrants. HR-EI-MS were performed on an

API-Qstar-Pulsar-1 spectrometer. HPLC was Agilent Technologies 1260 infinity II.

## 2 General procedure for preparation of N-(ortho-chloromethyl)aryl amides

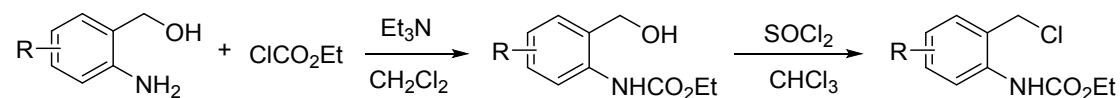

To a solution of 2-amino benzyl (3g, 20.5 mmol) in 35 mL of DCM was added dropwise ethyl chloroformate (3.2g, 22.5 mmol), then Et<sub>3</sub>N (22.5mmol) was added dropwise slowly. After addition, the mixture was stirred for 4 h at room temperature. The organic phase was dried and concentrated under reduced pressure to afford the desired *N*-protected 2-aminobenzyl alcohol without purification. *N*-protected 2-aminobenzyl alcohol was dissolved in CHCl<sub>3</sub> (20 mL), and SOCl<sub>2</sub> (1.2 equiv) was added dropwise at 0 °C. Then, the mixture was stirred at r.t. for 2 h and monitored by TLC. After completion, the reaction was quenched with aqueous NaHCO<sub>3</sub> solution and the mixture was extracted with DCM (3\*10 mL). The combined organic phases were washed with brine before being dried (Na<sub>2</sub>SO<sub>4</sub>) and concentrated in vacuum. Purification by flash column chromatography on silica gel eluting with EtOAc/petroleum ether yielded ethyl [2-(chloromethyl)aryl]-carbamates.

## 3 General Procedure A for the [4+1]-cycloaddition of *O*-aminobenzyl chloride with alkyne:

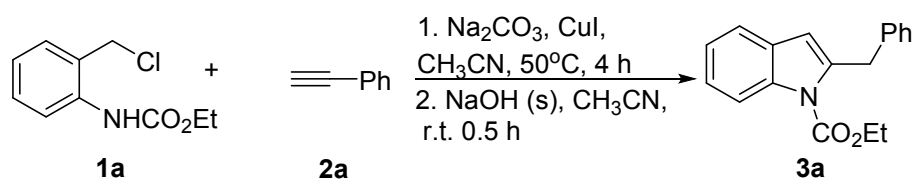

To a 10 mL round bottom flask with magnetic stirring bar were added starting materials **1a** (0.1 mmol, 1.0 eq.), Alkyne (0.12 mmol, 1.2 eq.), Na<sub>2</sub>CO<sub>3</sub> (0.12 mmol, 1.2 eq.) and CuI (0.005 mmol). After dry acetonitrile 2 mL was added, and the mixture was stirred at 50°C in an oil bath for 2~4 hours. The reaction was monitored by TLC. After the starting material **1a** was reacted, NaOH solid (0.1 mmol, 1 eq.) was added to the reaction solution, and the reaction was carried out for half an hour. To the residue was

added water (10 mL) and extracted with ethyl acetate (5 mL \* 3). The combined organic fractions were dried over Na<sub>2</sub>SO<sub>4</sub>, and concentrated under vacuum to yield the crude product, which was purified by column chromatography on silica gel (petroleum:ethyl acetate = 50:1 to 30:1) to afford the desired product **3a**.

## 4 The experimental results

### Optimization of reaction conditions (Table 1)

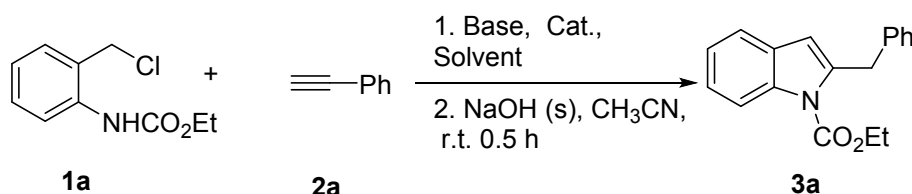

| Entry <sup>a</sup> | Cat.                                              | Solvent                         | Base                               | T(°C) | T(h) | Yield( <sup>b</sup> %) |
|--------------------|---------------------------------------------------|---------------------------------|------------------------------------|-------|------|------------------------|
| 1                  | CuI                                               | CH <sub>3</sub> CN              | Na <sub>2</sub> CO <sub>3</sub>    | r.t.  | 12   | 46                     |
| 2                  | CuI                                               | CH <sub>3</sub> CN              | Na <sub>2</sub> CO <sub>3</sub>    | 50    | 2    | 85                     |
| 3                  | CuI                                               | CH <sub>3</sub> CN              | K <sub>2</sub> CO <sub>3</sub>     | 50    | 2    | 35                     |
| 4                  | CuI                                               | CH <sub>3</sub> CN              | Cs <sub>2</sub> CO <sub>3</sub>    | 50    | 2    | 30                     |
| 5                  | CuI                                               | CH <sub>3</sub> CN              | NaOH                               | 50    | 2    | 16                     |
| 6                  | CuI                                               | CH <sub>3</sub> CN              | NaHCO <sub>3</sub>                 | 50    | 2    | 84                     |
| 7                  | CuI                                               | CH <sub>3</sub> CN              | NEt <sub>3</sub>                   | 50    | 2    | < 10                   |
| 8                  | CuI                                               | CH <sub>3</sub> CN              | Py.                                | 50    | 2    | < 10                   |
| 9                  | CuI                                               | CH <sub>3</sub> CN              | Piperidine                         | 50    | 2    | < 10                   |
| 10                 | CuI                                               | CH <sub>3</sub> CN              | CH <sub>3</sub> CO <sub>2</sub> Na | 50    | 2    | 60                     |
| 11                 | CuI                                               | DMSO                            | Na <sub>2</sub> CO <sub>3</sub>    | 50    | 2    | trace                  |
| 12                 | CuI                                               | THF                             | Na <sub>2</sub> CO <sub>3</sub>    | 50    | 2    | 53                     |
| 13                 | CuI                                               | CHCl <sub>3</sub>               | Na <sub>2</sub> CO <sub>3</sub>    | 50    | 2    | 13                     |
| 14                 | CuI                                               | Tol.                            | Na <sub>2</sub> CO <sub>3</sub>    | 50    | 2    | 32                     |
| 15                 | CuI                                               | Dioxane                         | Na <sub>2</sub> CO <sub>3</sub>    | 50    | 2    | 34                     |
| 16                 | CuI                                               | DMF                             | Na <sub>2</sub> CO <sub>3</sub>    | 50    | 2    | 60                     |
| 17                 | CuI                                               | CH <sub>2</sub> Cl <sub>2</sub> | Na <sub>2</sub> CO <sub>3</sub>    | 50    | 2    | 49                     |
| 18                 | CuI                                               | EA                              | Na <sub>2</sub> CO <sub>3</sub>    | 50    | 2    | 56                     |
| 19                 | CuI                                               | CH <sub>3</sub> OH              | Na <sub>2</sub> CO <sub>3</sub>    | 50    | 2    | trace                  |
| 20                 | Ag <sub>2</sub> O                                 | CH <sub>3</sub> CN              | Na <sub>2</sub> CO <sub>3</sub>    | 50    | 2    | 46                     |
| 21                 | Pd(AcO) <sub>2</sub>                              | CH <sub>3</sub> CN              | Na <sub>2</sub> CO <sub>3</sub>    | 50    | 2    | trace                  |
| 22                 | CuCO <sub>3</sub>                                 | CH <sub>3</sub> CN              | Na <sub>2</sub> CO <sub>3</sub>    | 50    | 2    | 51                     |
| 23                 | Cu(AcO) <sub>2</sub>                              | CH <sub>3</sub> CN              | Na <sub>2</sub> CO <sub>3</sub>    | 50    | 2    | 76                     |
| 24                 | Cu(CF <sub>3</sub> SO <sub>3</sub> ) <sub>2</sub> | CH <sub>3</sub> CN              | Na <sub>2</sub> CO <sub>3</sub>    | 50    | 2    | 50                     |
| 25                 | Cu <sub>2</sub> O                                 | CH <sub>3</sub> CN              | Na <sub>2</sub> CO <sub>3</sub>    | 50    | 2    | 74                     |

<sup>a</sup> Reaction conditions: a mixture of **1a** (1.0 mmol), **2a** (1.2 mmol), base (1.2 mmol) and Cat. (0.5mmol%) in solvent (2.0 mL) was stirred at 50°C for a certain period of time. <sup>b</sup> Isolated yield.

### Scheme 1. Substrate Scope 1

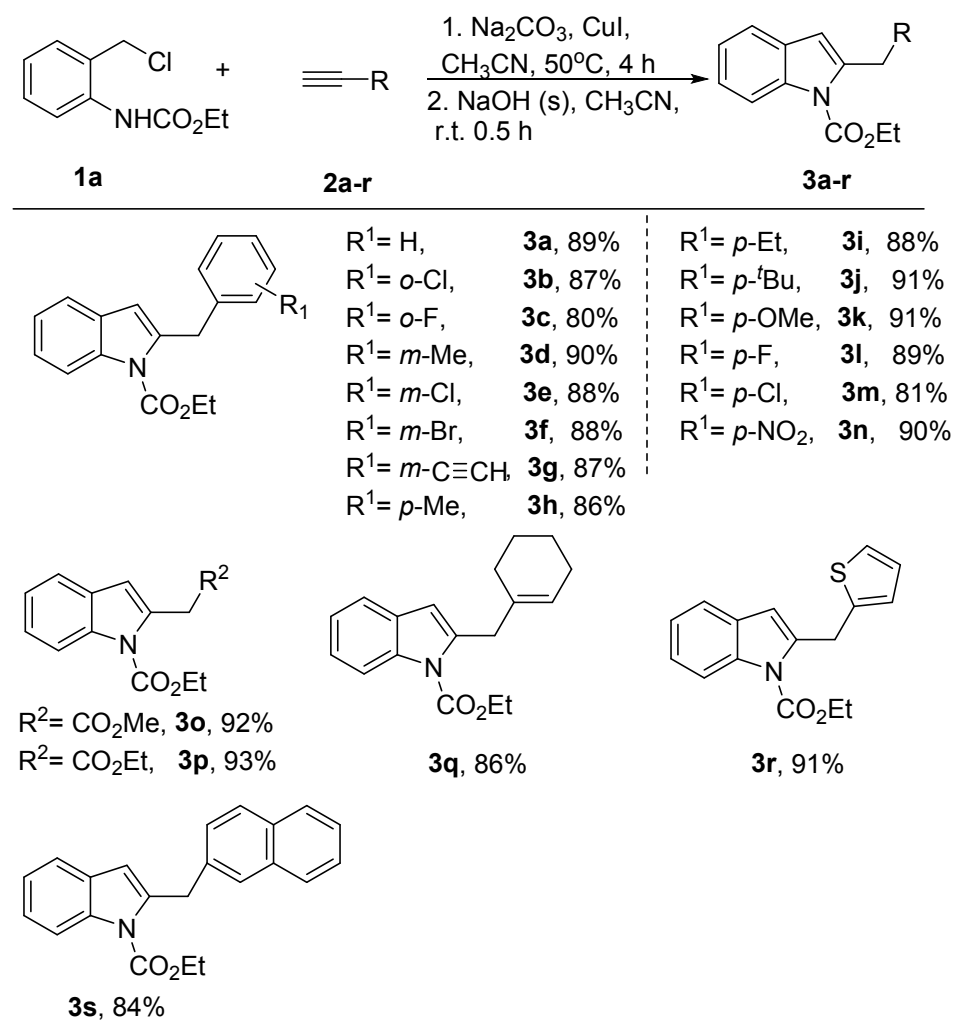

### Scheme 2. Substrate Scope 2

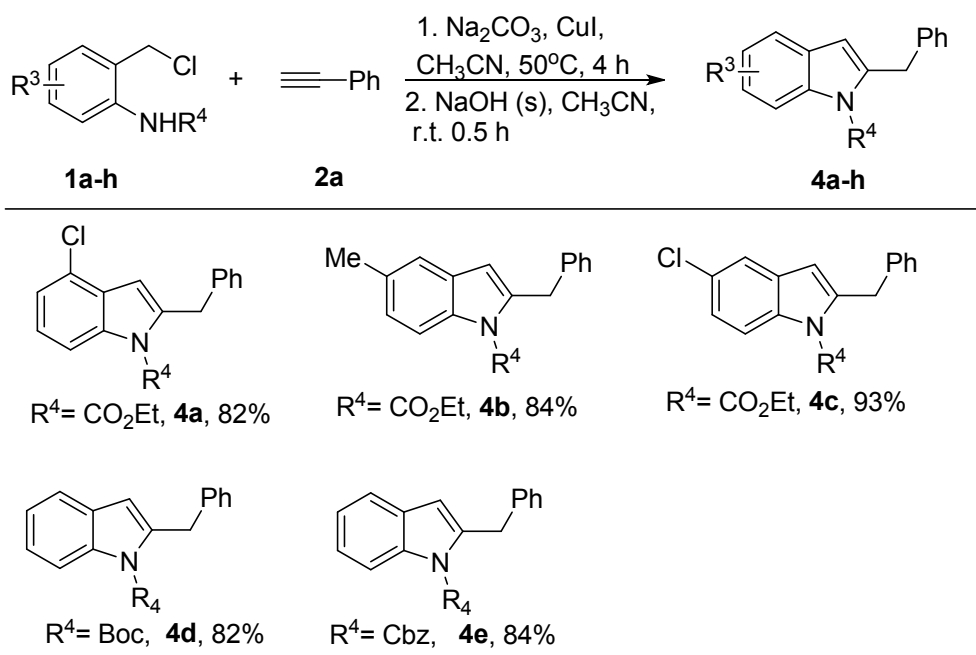

**Scheme 3. Gram scale experiment and product derivation**

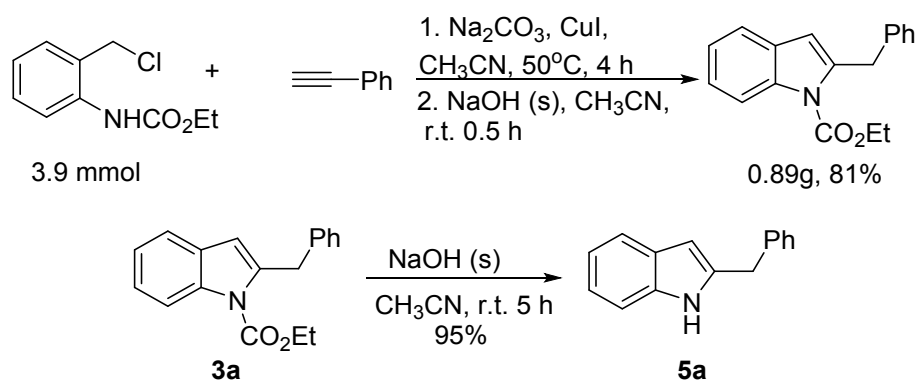

## 5 Structural characterization

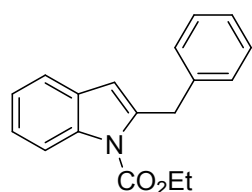

ethyl 2-benzyl-1H-indole-1-carboxylate (**3a**)

Colorless oil, yield 89%.  $^1\text{H NMR}$  (400 MHz,  $\text{CDCl}_3$ )  $\delta$  8.18 (d,  $J = 8.3$  Hz, 1H), 7.48 (d,  $J = 8.3$  Hz, 1H), 7.37 – 7.25 (m, 7H), 6.24 (s, 1H), 4.47–4.42 (m, 4H), 1.41 (t,  $J = 7.1$  Hz, 3H).  $^{13}\text{C NMR}$  (100 MHz,  $\text{CDCl}_3$ )  $\delta$  151.91, 140.46, 139.01, 136.81, 129.26, 128.86, 128.47, 126.39, 123.79, 123.00, 120.03, 115.75, 110.00, 63.07, 36.35, 14.27. HR-EI-MS (positive)  $m/z$  302.1157  $[\text{M}+\text{Na}]^+$  (calcd for  $\text{C}_{18}\text{H}_{17}\text{NNaO}_2$  302.1157).

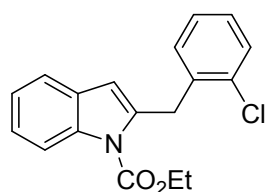

ethyl 2-(2-chlorobenzyl)-1H-indole-1-carboxylate (**3b**)

White solid, m.p.: 59-63 °C, yield 87%, reaction time 4 h. <sup>1</sup>H NMR (400 MHz, CDCl<sub>3</sub>) δ 8.23 (d, *J* = 8.3 Hz, 1H), 7.47 (t, *J* = 8.3 Hz, 2H), 7.33 – 7.21 (m, 4H), 7.10 (d, *J* = 8.3 Hz, 1H), 6.20 (s, 1H), 4.50 (s, 2H), 4.43 (q, *J* = 7.1 Hz, 2H), 1.35 (t, *J* = 7.1 Hz, 3H). <sup>13</sup>C NMR (100 MHz, CDCl<sub>3</sub>) δ 151.83, 138.46, 137.18, 136.94, 134.06, 130.13, 129.45, 129.25, 127.89, 126.95, 123.93, 123.06, 120.06, 115.78, 110.13, 63.12, 34.24, 14.08. HR-EI-MS (positive) *m/z* 336.0766 [M+Na]<sup>+</sup> (calcd for C<sub>18</sub>H<sub>16</sub>ClNNaO<sub>2</sub> 336.0767).

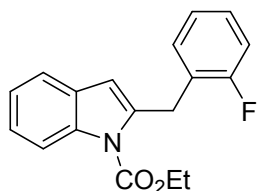

ethyl 2-(2-fluorobenzyl)-1H-indole-1-carboxylate (**3c**)

White oil, yield 80%, <sup>1</sup>H NMR (400 MHz, CDCl<sub>3</sub>) δ 8.18 (d, *J* = 8.2 Hz, 1H), 7.46 (d, *J* = 8.2 Hz, 1H), 7.32-7.08 (m, 7H), 6.23 (s, 1H), 4.47-4.42 (m, 4H), 1.39 (t, *J* = 7.2 Hz, 3H). <sup>13</sup>C NMR (100 MHz, CDCl<sub>3</sub>) δ 162.16, 159.71, 151.87, 138.71, 136.86, 130.56, 130.52, 128.19, 124.14, 124.10, 123.88, 123.02, 120.02, 115.74, 109.95, 63.12, 29.73, 29.47, 29.43, 14.15. HR-EI-MS (positive) *m/z* 320.1060 [M+Na]<sup>+</sup> (calcd for C<sub>18</sub>H<sub>16</sub>FNNaO<sub>2</sub> 320.1063).

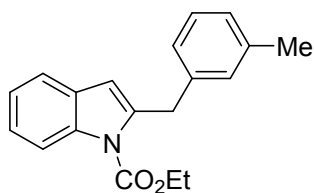

ethyl 2-(3-methylbenzyl)-1H-indole-1-carboxylate (**3d**)

Yellow solid, m.p.: 55-57 °C, yield 90%, reaction time 4 h. <sup>1</sup>H NMR (400 MHz, CDCl<sub>3</sub>) δ 8.21 (d, *J* = 8.3 Hz, 1H), 7.50 (d, *J* = 8.3 Hz, 1H), 7.33-7.25 (m, 3H), 7.13-7.08 (m, 3H), 6.26 (s, 1H), 4.47 (q, *J* = 7.2 Hz, 2H), 4.40 (s, 2H), 2.39 (s, 3H), 1.44 (t, *J* = 7.2 Hz, 3H). <sup>13</sup>C NMR (100 MHz, CDCl<sub>3</sub>) δ 151.93, 140.65, 138.93, 138.03, 136.89, 129.63, 129.34, 128.35, 127.14, 125.97, 123.75, 122.98, 120.03, 115.76, 109.95, 63.05, 36.27, 21.47, 14.27. HR-EI-MS (positive) *m/z* 316.1315 [M+Na]<sup>+</sup> (calcd for C<sub>19</sub>H<sub>19</sub>NNaO<sub>2</sub> 316.1313).

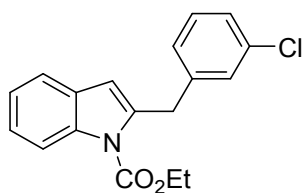

ethyl 2-(3-chlorobenzyl)-1H-indole-1-carboxylate (**3e**)

Yellow solid, m.p.: 41-42 °C, yield 88%. <sup>1</sup>H NMR (400 MHz, CDCl<sub>3</sub>) δ 8.15 (d, *J* = 8.2 Hz, 1H), 7.49 (d, *J* = 8.2 Hz, 1H), 7.32- 7.23 (m, 5H), 7.13-7.11 (m, 1H), 6.29 (s, 1H), 4.44 (q, *J* = 7.2 Hz, 2H), 4.39 (s, 2H), 1.41 (t, *J* = 7.2 Hz, 3H). <sup>13</sup>C NMR (100 MHz, CDCl<sub>3</sub>) δ 151.76, 141.13, 139.29, 136.77, 134.24, 129.65, 129.12, 128.85, 126.97, 126.58, 123.99, 123.08, 120.12, 115.79, 110.29, 63.14, 35.89, 14.25. HR-EI-MS (positive) *m/z* 336.0766 [M+Na]<sup>+</sup> (calcd for C<sub>18</sub>H<sub>16</sub>ClNNaO<sub>2</sub> 336.0767).

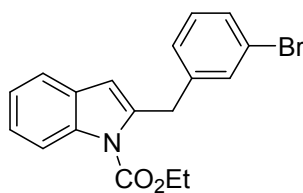

ethyl 2-(3-bromobenzyl)-1H-indole-1-carboxylate (**3f**)

Colorless oil, yield 88%. <sup>1</sup>H NMR (400 MHz, CDCl<sub>3</sub>) δ 8.15 (d, *J* = 8.0 Hz, 1H), 7.48 (d, *J* = 8.0 Hz, 1H), 7.40-7.39 (m, 2H), 7.29- 7.17 (m, 4H), 6.29 (s, 1H), 4.47-4.36 (m, 4H), 1.41 (t, *J* = 7.1 Hz, 3H). <sup>13</sup>C NMR (100 MHz, CDCl<sub>3</sub>) δ 151.76, 141.42, 139.27, 136.77, 131.78, 129.96, 129.51, 129.12, 127.44,

123.99, 123.08, 122.49, 120.12, 115.79, 110.31, 63.14, 35.86, 14.26. HR-EI-MS (positive)  $m/z$  380.0260  $[M+Na]^+$  (calcd for  $C_{18}H_{16}BrNNaO_2$  380.0262).

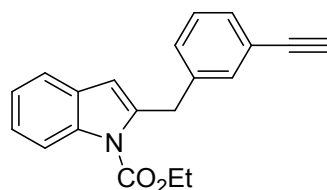

ethyl 2-(3-ethynylbenzyl)-1H-indole-1-carboxylate(**3g**)

Colorless oil, yield 87%.  $^1H$  NMR (400 MHz,  $CDCl_3$ )  $\delta$  8.15 (d,  $J = 8.2$  Hz, 1H), 7.48 (d,  $J = 8.2$  Hz, 1H), 7.41-7.38 (m, 2H), 7.31-7.22 (m, 4H), 6.26 (s, 1H), 4.44 (q,  $J = 7.2$  Hz, 2H), 4.38 (s, 2H), 3.07 (s, 1H), 1.40 (t,  $J = 7.2$  Hz, 3H).  $^{13}C$  NMR (100 MHz,  $CDCl_3$ )  $\delta$  151.79, 139.60, 139.31, 136.79, 132.41, 130.22, 129.43, 129.16, 128.43, 123.92, 123.04, 122.16, 120.08, 115.77, 110.24, 83.69, 63.11, 35.97, 14.25. HR-EI-MS (positive)  $m/z$  326.1160  $[M+Na]^+$  (calcd for  $C_{20}H_{17}NNaO_2$  326.1157).

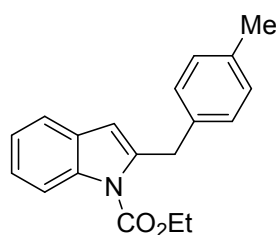

ethyl 2-(4-methylbenzyl)-1H-indole-1-carboxylate(**3h**)

Colorless oil, yield 86%.  $^1H$  NMR (400 MHz,  $CDCl_3$ )  $\delta$  8.17 (d,  $J = 8.2$  Hz, 1H), 7.46 (d,  $J = 7.5$  Hz, 1H), 7.30-7.16 (m, 6H), 6.22 (s, 1H), 4.46 (q,  $J = 7.2$  Hz, 2H), 4.37 (s, 2H), 2.38 (s, 3H), 1.43 (t,  $J = 7.2$  Hz, 3H).  $^{13}C$  NMR (100 MHz,  $CDCl_3$ )  $\delta$  151.94, 140.90, 136.84, 135.87, 129.31, 129.14, 128.80, 123.70, 122.94, 119.99, 115.72, 109.82, 63.03, 35.92, 21.10, 14.29. HR-EI-MS (positive)  $m/z$  316.1311  $[M+Na]^+$  (calcd for  $C_{19}H_{19}NNaO_2$  316.1313).

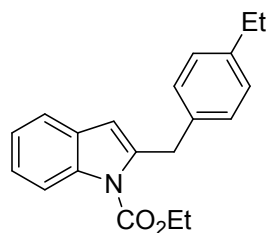

ethyl 2-(4-ethylbenzyl)-1H-indole-1-carboxylate(**3i**)

Colorless oil, yield 88%.  $^1H$  NMR (400 MHz,  $CDCl_3$ )  $\delta$  8.16 (d,  $J = 8.2$  Hz, 1H), 7.46 (d,  $J = 8.2$  Hz, 1H), 7.31-7.18 (m, 6H), 6.22 (s, 1H), 4.45 (q,  $J = 7.2$  Hz, 2H), 4.37 (s, 2H), 2.68 (q,  $J = 7.2$  Hz, 2H), 1.42 (t,  $J = 7.2$  Hz, 3H), 1.27 (t,  $J = 7.2$  Hz, 3H).  $^{13}C$  NMR (100 MHz,  $CDCl_3$ )  $\delta$  151.94, 142.32, 140.88, 136.82, 136.10, 129.30, 128.83, 127.93, 123.69, 122.93, 119.98, 115.71, 109.82, 63.03, 35.93, 28.51, 15.71, 14.27. HR-EI-MS (positive)  $m/z$  330.1473  $[M+Na]^+$  (calcd for  $C_{20}H_{21}NNaO_2$  330.1470).

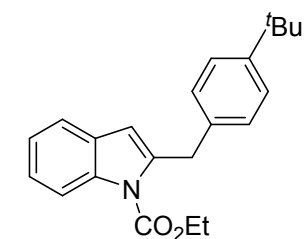

ethyl 2-(4-(tert-butyl)benzyl)-1H-indole-1-carboxylate(**3j**)

Colorless oil, yield 91%.  $^1H$  NMR (400 MHz,  $CDCl_3$ )  $\delta$  8.14 - 8.12 (m, 1H), 7.43-7.15 (m, 6H), 6.21 (brs, 1H), 4.42 (q,  $J = 7.2$  Hz, 2H), 4.35 (s, 2H), 1.37 (t,  $J = 7.2$  Hz, 3H), 1.33 (s, 9H).  $^{13}C$  NMR (100 MHz,  $CDCl_3$ )  $\delta$  151.94, 149.22, 140.81, 136.84, 135.88, 129.31, 128.52, 125.32, 123.67, 122.92, 119.97, 115.69, 109.80, 63.00, 35.80, 34.44, 31.43, 14.21. HR-EI-MS (positive)  $m/z$  358.1780  $[M+Na]^+$  (calcd for  $C_{22}H_{25}NNaO_2$  358.1783).

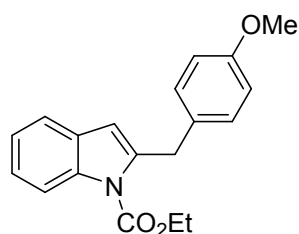

ethyl 2-(4-methoxybenzyl)-1H-indole-1-carboxylate(**3k**)

Colorless oil, yield 91%.  $^1H$  NMR (400 MHz,  $CDCl_3$ )  $\delta$  8.15 (d,  $J = 8.2$  Hz, 1H), 7.46 (d,  $J = 8.2$  Hz, 1H), 7.29-7.17 (m, 4H), 6.91-6.87

(m, 2H), 6.20 (s, 1H), 4.46 (q,  $J = 7.1$  Hz, 2H), 4.35 (s, 2H), 3.84 (s, 3H), 1.44 (t,  $J = 7.2$  Hz, 3H).  $^{13}\text{C}$  NMR (100 MHz,  $\text{CDCl}_3$ )  $\delta$  158.21, 151.93, 141.18, 136.83, 130.98, 129.91, 129.29, 123.69, 122.94, 119.98, 115.70, 113.86, 109.72, 63.04, 55.29, 35.47, 14.31. HR-EI-MS (positive)  $m/z$  332.1263  $[\text{M}+\text{Na}]^+$  (calcd for  $\text{C}_{19}\text{H}_{19}\text{NNaO}_3$  332.1263).

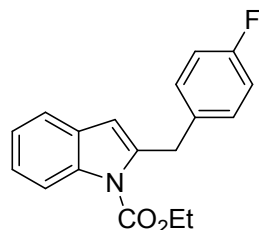

ethyl 2-(4-fluorobenzyl)-1H-indole-1-carboxylate(**3l**)

Colorless oil, yield 89%.  $^1\text{H}$  NMR (400 MHz,  $\text{CDCl}_3$ )  $\delta$  8.19 (d,  $J = 8.3$  Hz, 1H), 7.50 (d,  $J = 8.3$  Hz, 1H), 7.33- 7.21 (m, 4H), 7.08-7.03 (m, 2H), 6.26 (s, 1H), 4.48 (q,  $J = 7.2$  Hz, 2H), 4.40 (s, 2H), 1.44 (t,  $J = 7.2$  Hz, 3H).  $^{13}\text{C}$  NMR (100 MHz,  $\text{CDCl}_3$ )  $\delta$  162.84, 160.41, 151.85, 140.34, 136.83, 134.71, 134.68, 130.33, 130.25, 129.23, 123.91, 123.07, 120.09, 115.80, 115.34, 115.13, 109.99, 63.11, 35.50, 14.29. HR-EI-MS (positive)  $m/z$  320.1063  $[\text{M}+\text{Na}]^+$  (calcd for  $\text{C}_{18}\text{H}_{16}\text{FNNaO}_2$  320.1063).

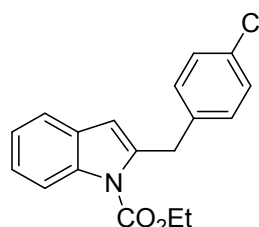

ethyl 2-(4-chlorobenzyl)-1H-indole-1-carboxylate(**3m**)

Colorless oil, yield 81%.  $^1\text{H}$  NMR (400 MHz,  $\text{CDCl}_3$ )  $\delta$  8.13 (d,  $J = 8.2$  Hz, 1H), 7.47 (d,  $J = 8.2$  Hz, 1H), 7.31- 7.16 (m, 6H), 6.25 (s, 1H), 4.44 (q,  $J = 7.2$  Hz, 2H), 4.37 (s, 2H), 1.42 (t,  $J = 7.2$  Hz, 3H).  $^{13}\text{C}$  NMR (100 MHz,  $\text{CDCl}_3$ )  $\delta$  151.79, 139.79, 137.53, 136.75, 132.14, 130.14, 129.14, 128.55, 123.94, 123.06, 120.08, 115.76, 110.11, 63.12, 35.62, 14.28. HR-EI-MS (positive)  $m/z$  336.0765  $[\text{M}+\text{Na}]^+$  (calcd for  $\text{C}_{18}\text{H}_{16}\text{ClNNaO}_2$  336.0767).

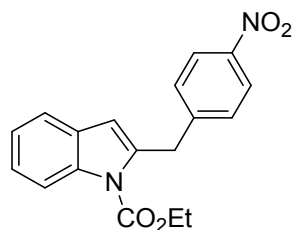

ethyl 2-(4-nitrobenzyl)-1H-indole-1-carboxylate(**3n**)

Colorless oil, yield 90%.  $^1\text{H}$  NMR (400 MHz,  $\text{CDCl}_3$ )  $\delta$  8.20-8.12 (m, 3H), 7.51-7.28 (m, 5H), 6.38 (brs, 1H), 4.52 (s, 2H), 4.43 (q,  $J = 7.2$  Hz, 2H), 1.40 (t,  $J = 7.1$  Hz, 3H).  $^{13}\text{C}$  NMR (100 MHz,  $\text{CDCl}_3$ )  $\delta$  151.64, 147.02, 146.68, 138.07, 136.63, 129.40, 128.99, 124.30, 123.68, 123.27, 120.27, 115.88, 110.73, 63.27, 36.02, 14.28. HR-EI-MS (positive)  $m/z$  347.1008  $[\text{M}+\text{Na}]^+$  (calcd for  $\text{C}_{18}\text{H}_{16}\text{N}_2\text{NaO}_4$  347.1008).

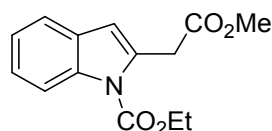

ethyl 2-(2-methoxy-2-oxoethyl)-1H-indole-1-carboxylate (**3o**)

Colorless oil, yield 92%.  $^1\text{H}$  NMR (400 MHz,  $\text{CDCl}_3$ )  $\delta$  8.14 (d,  $J = 8.2$  Hz, 1H), 7.54-7.25 (m, 3H), 6.53 (brs, 1H), 4.50 (q,  $J = 7.2$  Hz, 2H), 4.05 (s, 2H), 3.75 (s, 3H), 1.49 (t,  $J = 7.2$  Hz, 3H).  $^{13}\text{C}$  NMR (100 MHz,  $\text{CDCl}_3$ )  $\delta$  170.82, 151.83, 136.51, 133.13, 129.01, 128.97, 124.30, 123.10, 120.38, 115.80, 111.11, 63.33, 52.14, 36.20, 29.72, 14.27. HR-EI-MS (positive)  $m/z$  284.0898  $[\text{M}+\text{Na}]^+$  (calcd for  $\text{C}_{14}\text{H}_{15}\text{NNaO}_4$  284.0899).

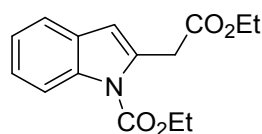

ethyl 2-(2-ethoxy-2-oxoethyl)-1H-indole-1-carboxylate(**3p**)

Colorless oil, yield 93%.  $^1\text{H}$  NMR (400 MHz,  $\text{CDCl}_3$ )  $\delta$  8.16 (d,  $J = 8.3$  Hz, 1H), 7.52-7.28 (m, 3H), 6.53 (brs, 1H), 4.50 (q,  $J = 7.2$  Hz, 2H), 4.22



(q,  $J = 7.2$  Hz, 2H), 4.05 (s, 2H), 1.49 (t,  $J = 7.2$  Hz, 3H), 1.29 (t,  $J = 7.2$  Hz, 3H).  $^{13}\text{C}$  NMR (100 MHz,  $\text{CDCl}_3$ )  $\delta$  170.32, 151.80, 136.56, 133.33, 129.02, 124.22, 123.05, 120.34, 115.79, 110.99, 63.27, 60.96, 36.41, 14.27, 14.23. HR-EI-MS (positive)  $m/z$  298.1055 [ $\text{M}+\text{Na}$ ] $^+$  (calcd for  $\text{C}_{15}\text{H}_{17}\text{NNaO}_4$  298.1055).

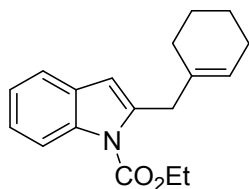

ethyl 2-(cyclohex-1-en-1-ylmethyl)-1H-indole-1-carboxylate(**3q**)

Colorless oil, yield 86%.  $^1\text{H}$  NMR (400 MHz,  $\text{CDCl}_3$ )  $\delta$  8.16 (d,  $J = 8.1$  Hz, 1H), 7.50 (d,  $J = 8.1$  Hz, 1H), 7.30-7.22 (m, 2H), 6.40 (s, 1H), 5.40 (s, 1H), 4.50 (q,  $J = 7.1$  Hz, 2H), 3.67 (s, 2H), 2.08-2.00 (m, 4H), 1.71- 1.62 (m, 4H), 1.50 (t,  $J = 7.1$  Hz, 3H).  $^{13}\text{C}$  NMR (100 MHz,  $\text{CDCl}_3$ )  $\delta$  151.97, 140.01, 136.84, 135.31, 129.40, 123.44, 123.10, 122.82, 119.82, 115.58, 108.96, 62.93, 37.96, 28.78, 25.31, 23.08, 22.45, 14.39. HR-EI-MS (positive)  $m/z$  306.1468 [ $\text{M}+\text{Na}$ ] $^+$  (calcd for  $\text{C}_{18}\text{H}_{21}\text{NNaO}_2$  306.1470).

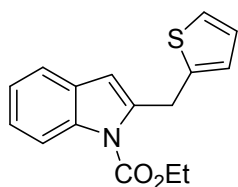

ethyl 2-(thiophen-2-ylmethyl)-1H-indole-1-carboxylate(**3r**)

Colorless oil, yield 91%.  $^1\text{H}$  NMR (400 MHz,  $\text{CDCl}_3$ )  $\delta$  8.16 (d,  $J = 8.3$  Hz, 1H), 7.49 (d,  $J = 7.6$  Hz, 1H), 7.30-7.20 (m, 3H), 6.98- 6.89 (m, 2H), 6.40 (s, 1H), 4.61 (s, 2H), 4.49 (q,  $J = 7.2$  Hz, 2H), 1.46 (t,  $J = 7.2$  Hz, 3H).  $^{13}\text{C}$  NMR (100 MHz,  $\text{CDCl}_3$ )  $\delta$  151.86, 141.58, 139.80, 129.13, 126.81, 125.64, 123.97, 123.94, 123.04, 120.19, 115.75, 109.62, 63.19, 30.56, 14.30. HR-EI-MS (positive)  $m/z$  308.0723 [ $\text{M}+\text{Na}$ ] $^+$  (calcd for  $\text{C}_{16}\text{H}_{15}\text{NNaO}_2\text{S}$  308.0721).

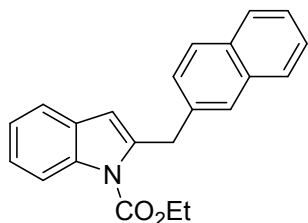

ethyl 2-(naphthalen-2-ylmethyl)-1H-indole-1-carboxylate (**3s**)

Colorless oil, yield 84%.  $^1\text{H}$  NMR (400 MHz,  $\text{CDCl}_3$ )  $\delta$  8.25-8.22 (m, 1H), 7.91- 7.83 (m, 4H), 7.71 (s, 1H), 7.62-7.28 (m, 5H), 6.31 (s, 1H), 4.61 (s, 2H), 4.46 (dd,  $J = 7.1, 0.9$  Hz, 2H), 1.42 (td,  $J = 7.1, 0.8$  Hz, 3H).  $^{13}\text{C}$  NMR (100 MHz,  $\text{CDCl}_3$ )  $\delta$  151.94, 140.43, 136.60, 133.68, 132.33, 129.35, 128.05, 127.84, 127.72, 127.69, 127.63, 127.17, 126.06, 125.53, 123.88, 123.07, 120.12, 115.84, 110.23, 63.12, 36.53, 14.32. HR-EI-MS (positive)  $m/z$  352.1313 [ $\text{M}+\text{Na}$ ] $^+$  (calcd for  $\text{C}_{22}\text{H}_{19}\text{NNaO}_2$  352.1313).

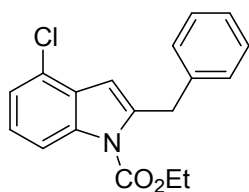

ethyl 2-benzyl-4-chloro-1H-indole-1-carboxylate(**4a**)

Colorless oil, yield 82%.  $^1\text{H}$  NMR (400 MHz,  $\text{CDCl}_3$ )  $\delta$  8.07 (d,  $J = 7.8$  Hz, 1H), 7.38-7.19 (m, 7H), 6.39 (s, 1H), 4.44- 4.42 (m, 4H), 1.39 (t,  $J = 7.2$  Hz, 3H).  $^{13}\text{C}$  NMR (100 MHz,  $\text{CDCl}_3$ )  $\delta$  151.56, 141.18, 138.53, 137.53, 128.76, 128.54, 127.97, 126.51, 125.26, 124.39, 122.76, 114.26, 107.88, 63.39, 36.29, 14.18. HR-EI-MS (positive)  $m/z$  336.0765 [ $\text{M}+\text{Na}$ ] $^+$  (calcd for  $\text{C}_{18}\text{H}_{16}\text{ClNNaO}_2$  336.0767).

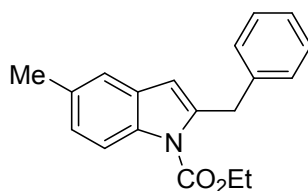

ethyl 2-benzyl-5-methyl-1H-indole-1-carboxylate(**4b**)

Colorless oil, yield 84%.  $^1\text{H}$  NMR (400 MHz,  $\text{CDCl}_3$ )  $\delta$  8.02 (d,  $J =$

8.5 Hz, 1H), 7.36-7.23 (m, 6H), 7.11 (d,  $J = 8.5$  Hz, 1H), 6.17 (s, 1H), 4.44-4.39 (m, 4H), 2.45 (s, 3H), 1.39 (t,  $J = 7.2$  Hz, 3H).  $^{13}\text{C}$  NMR (100 MHz,  $\text{CDCl}_3$ )  $\delta$  151.88, 140.41, 139.12, 135.02, 132.42, 129.45, 128.80, 128.40, 126.30, 125.06, 119.98, 115.39, 109.79, 62.91, 36.31, 21.24, 14.24. HR-EI-MS (positive)  $m/z$  316.1312  $[\text{M}+\text{Na}]^+$  (calcd for  $\text{C}_{19}\text{H}_{19}\text{NNaO}_2$  316.1313).

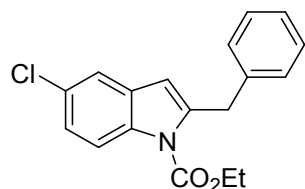

ethyl 2-benzyl-5-chloro-1H-indole-1-carboxylate (**4c**)

Colorless oil, yield 93%.  $^1\text{H}$  NMR (400 MHz,  $\text{CDCl}_3$ )  $\delta$  8.07 (d,  $J = 8.9$  Hz, 1H), 7.42-7.22 (m, 7H), 6.15 (s, 1H), 4.46-4.38 (m, 4H), 1.39 (t,  $J = 7.1$  Hz, 3H).  $^{13}\text{C}$  NMR (100 MHz,  $\text{CDCl}_3$ )  $\delta$  151.56, 141.96, 138.56, 135.20, 130.44, 128.81, 128.54, 128.52, 126.51, 123.82, 119.54, 116.74, 109.20, 63.31, 36.32, 14.21. HR-EI-MS (positive)  $m/z$  336.0767  $[\text{M}+\text{Na}]^+$  (calcd for  $\text{C}_{18}\text{H}_{16}\text{ClNNaO}_2$  336.0767).

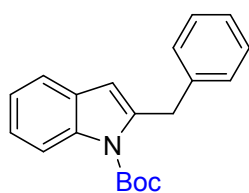

tert-butyl 2-benzyl-1H-indole-1-carboxylate (**4d**)

Colorless oil, yield 82%.  $^1\text{H}$  NMR (400 MHz,  $\text{CDCl}_3$ )  $\delta$  8.20 (d,  $J = 8.3$  Hz, 1H), 7.49-7.23 (m, 8H), 6.20 (s, 1H), 4.44 (s, 2H), 1.64 (s, 9H).  $^{13}\text{C}$  NMR (100 MHz,  $\text{CDCl}_3$ )  $\delta$  150.55, 140.51, 139.22, 136.96, 132.56, 129.16, 128.97, 128.50, 128.44, 126.37, 123.57, 122.70, 119.97, 115.60, 109.39, 83.89, 36.37, 28.14. HR-EI-MS (positive)  $m/z$  330.1471  $[\text{M}+\text{Na}]^+$  (calcd for  $\text{C}_{20}\text{H}_{21}\text{NNaO}_2$  330.1470).

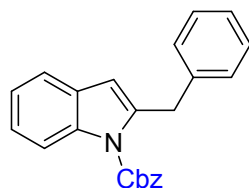

benzyl 2-benzyl-1H-indole-1-carboxylate (**4e**)

Colorless oil, yield 84%.  $^1\text{H}$  NMR (400 MHz,  $\text{CDCl}_3$ )  $\delta$  8.19 (d,  $J = 8.1$  Hz, 1H), 7.50-7.42 (m, 7H), 7.37-7.21 (m, 6H), 6.27 (s, 1H), 5.42 (s, 2H), 4.42 (m, 2H).  $^{13}\text{C}$  NMR (100 MHz,  $\text{CDCl}_3$ )  $\delta$  151.79, 140.51, 138.90, 136.88, 135.03, 129.33, 128.91, 128.79, 128.72, 128.64, 128.59, 128.48, 128.37, 126.39, 123.92, 123.12, 115.83, 110.26, 68.71, 36.35. HR-EI-MS (positive)  $m/z$  364.1313  $[\text{M}+\text{Na}]^+$  (calcd for  $\text{C}_{23}\text{H}_{19}\text{NNaO}_2$  364.1313).

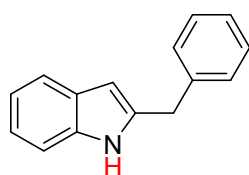

2-benzyl-1H-indole (**5a**)

Colorless oil, yield 95%.  $^1\text{H}$  NMR (400 MHz,  $\text{CDCl}_3$ )  $\delta$  7.79 (s, 1H), 7.60 (d,  $J = 7.5$  Hz, 1H), 7.40-7.11 (m, 8H), 6.38 (s, 1H), 4.17 (s, 2H).  $^{13}\text{C}$  NMR (100 MHz,  $\text{CDCl}_3$ )  $\delta$  138.57, 137.83, 136.31, 128.88, 128.77, 128.72, 126.78, 121.35, 120.04, 119.76, 110.52, 101.14, 34.75. HR-EI-MS (positive)  $m/z$  230.0945  $[\text{M}+\text{Na}]^+$  (calcd for  $\text{C}_{15}\text{H}_{13}\text{NNa}$  230.0946).

## 6 Original spectrogram

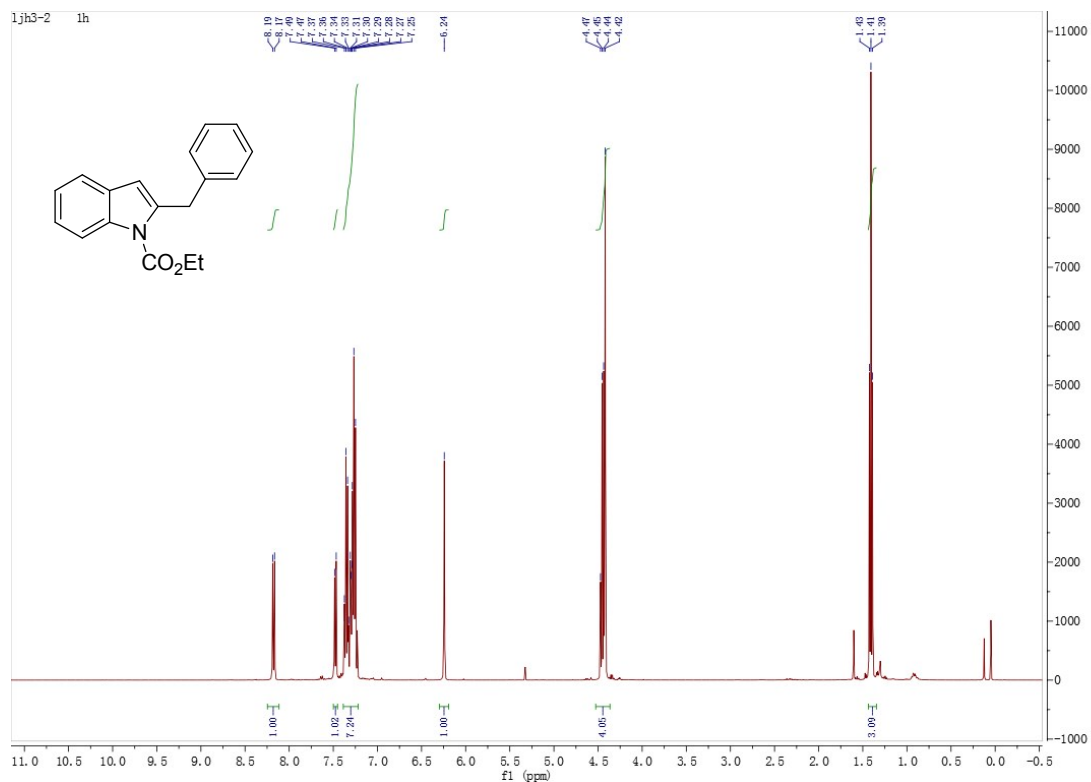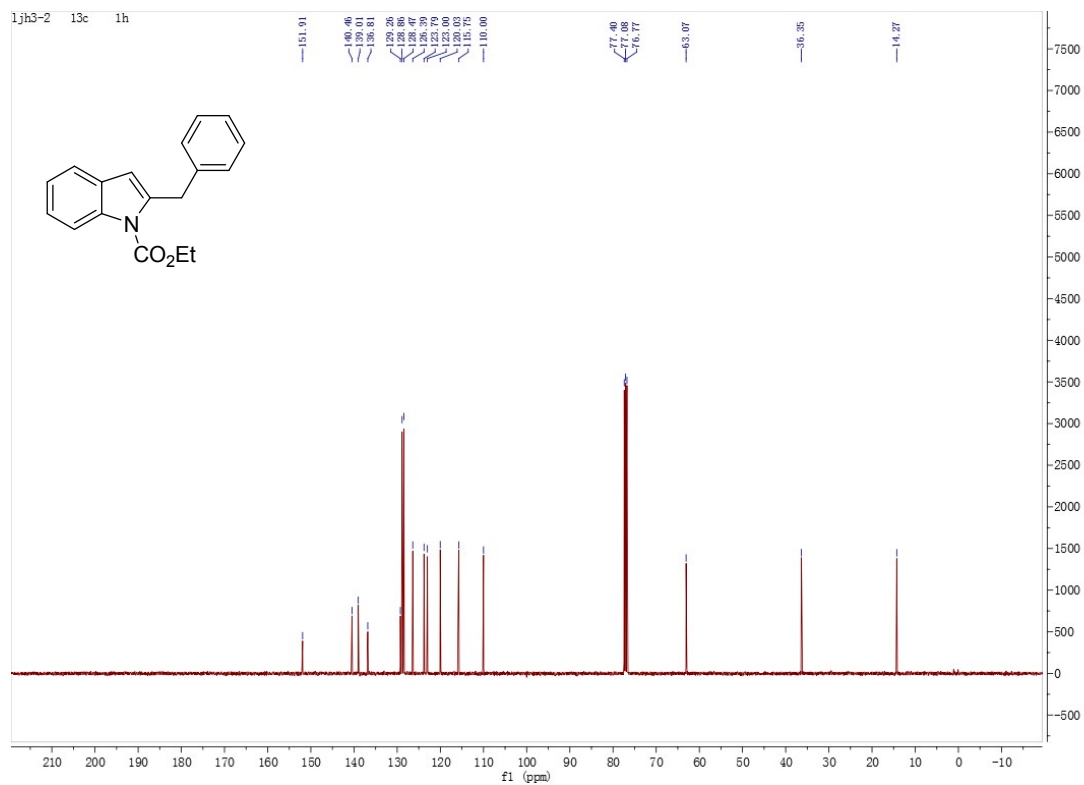

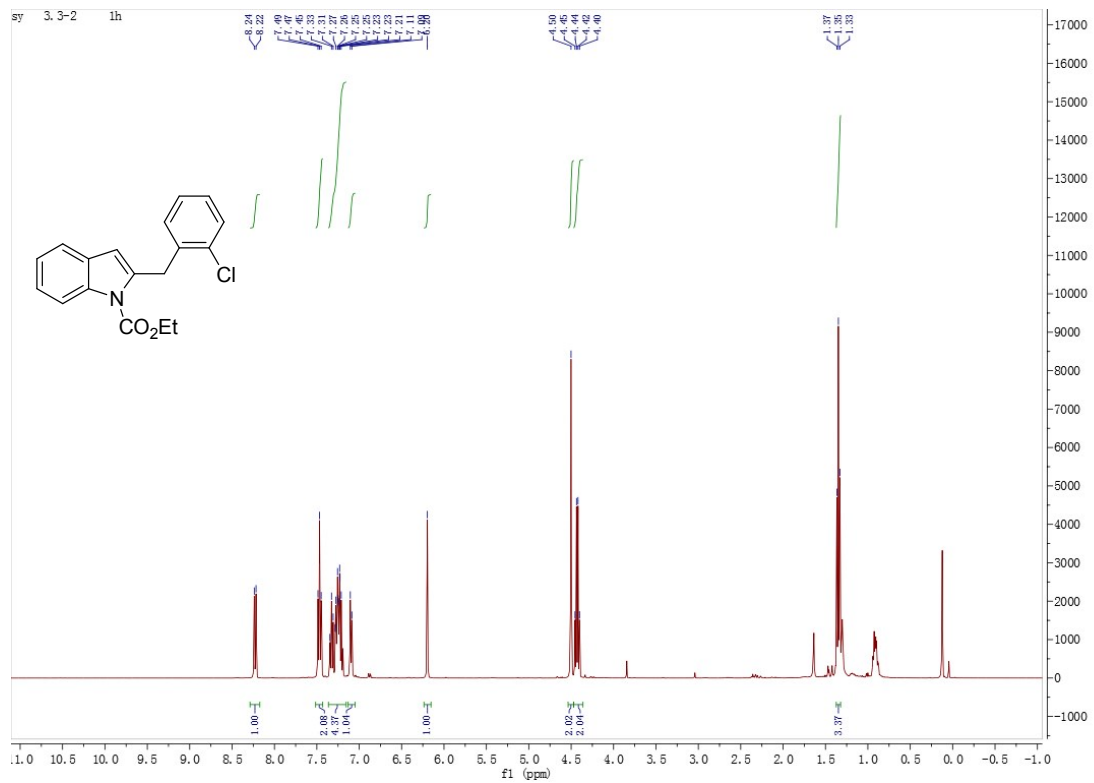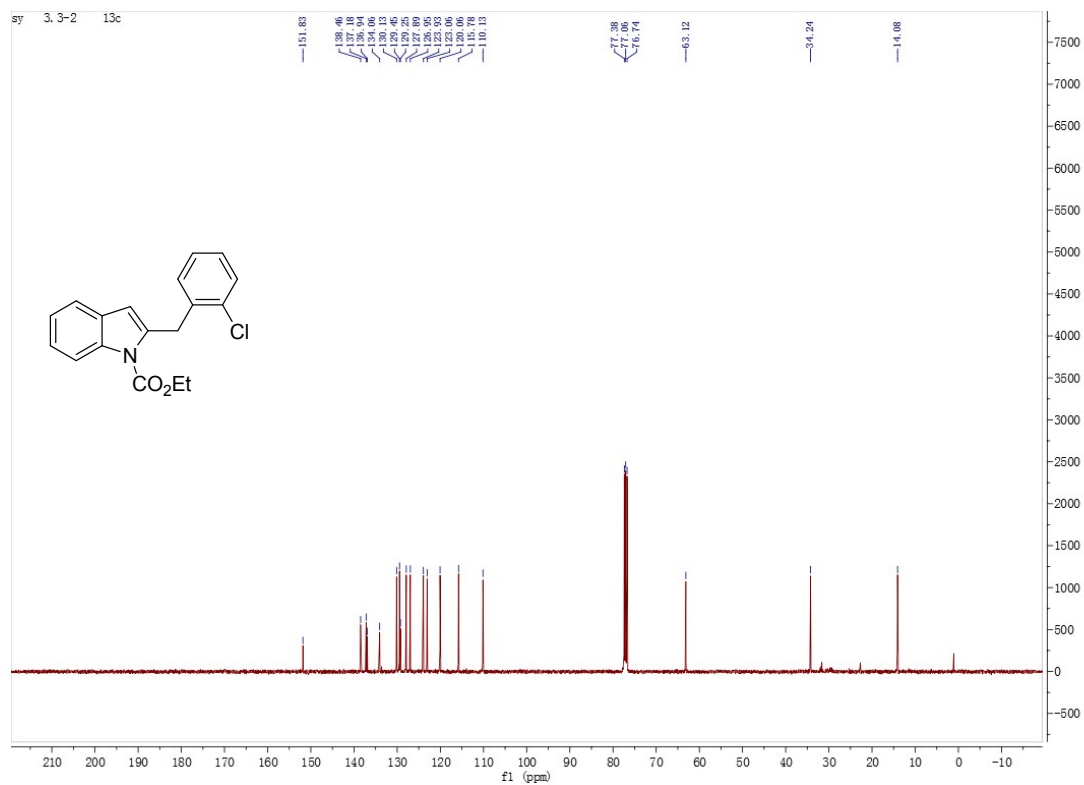

zyl-3 1h

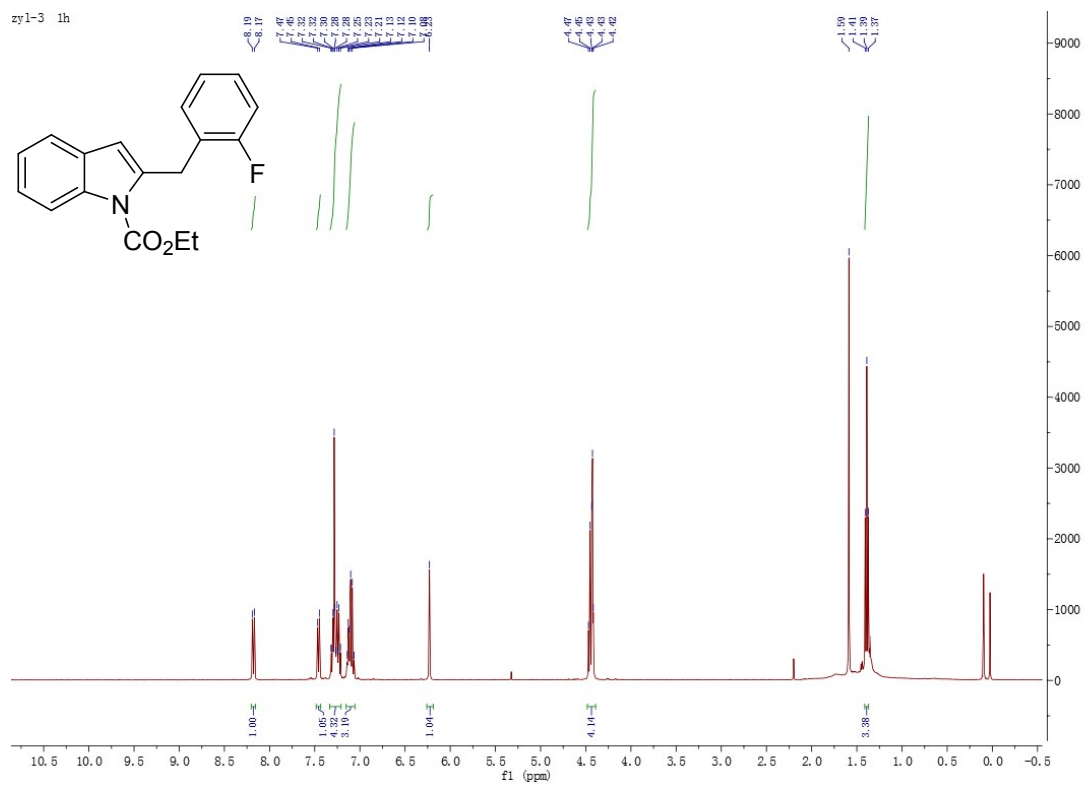

zyl-3 13c

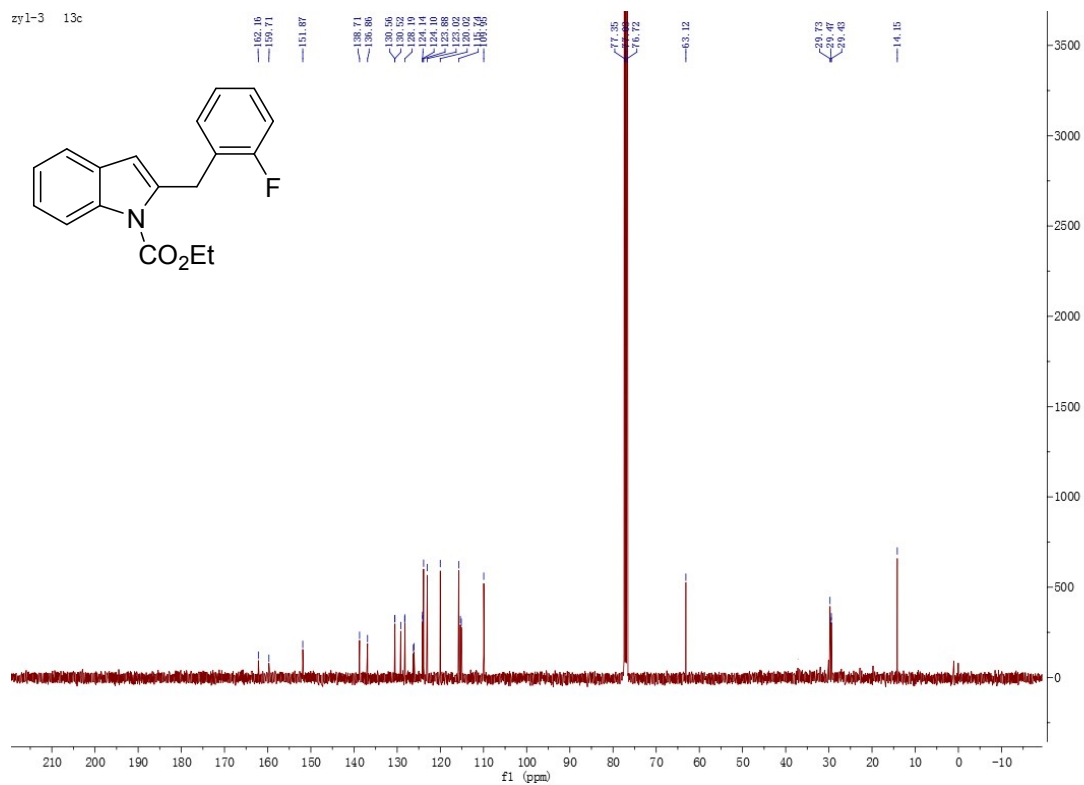

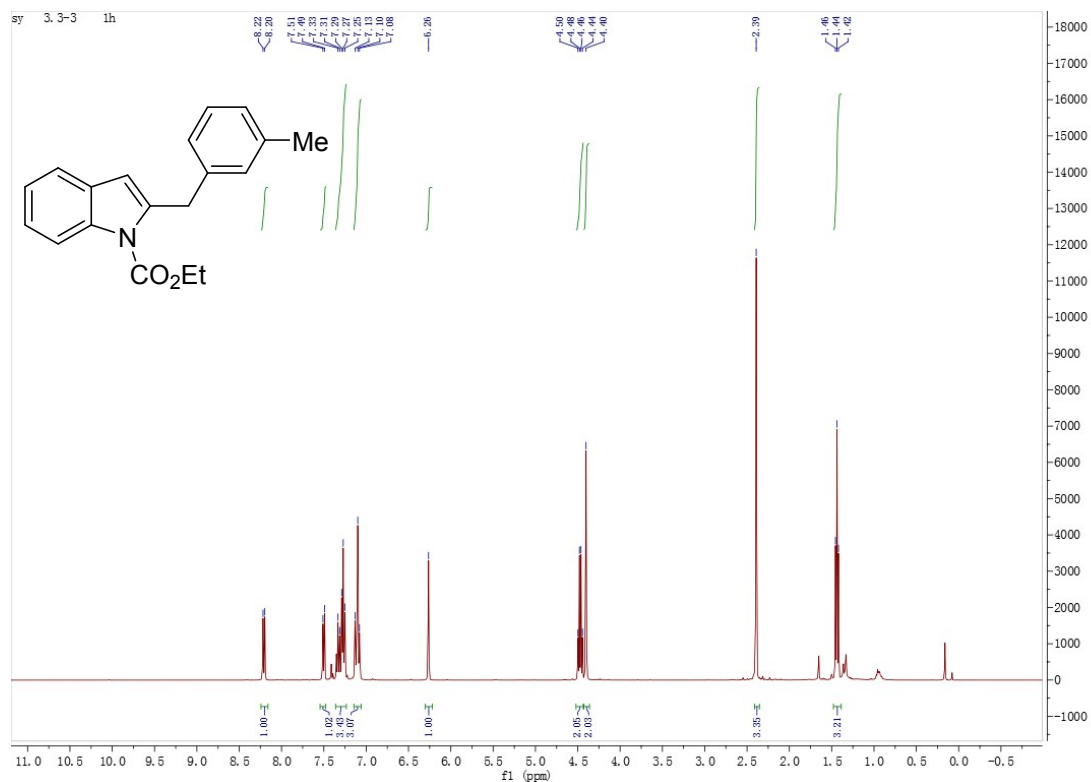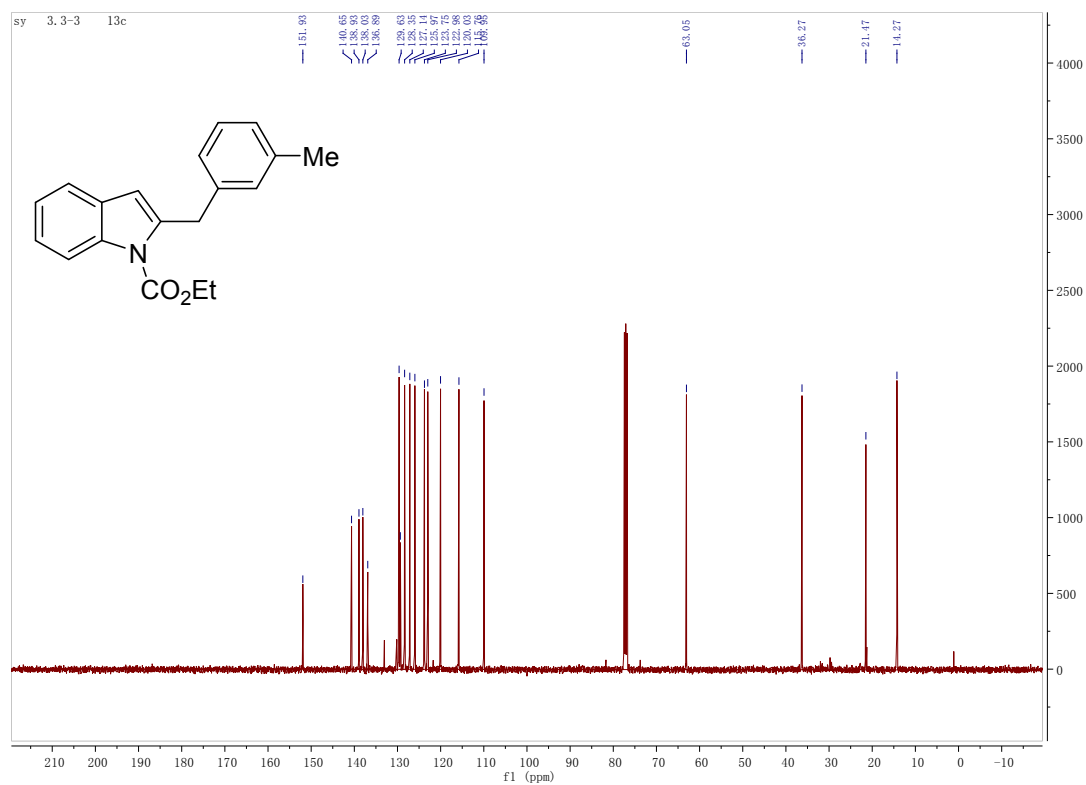

zyl-4 1h

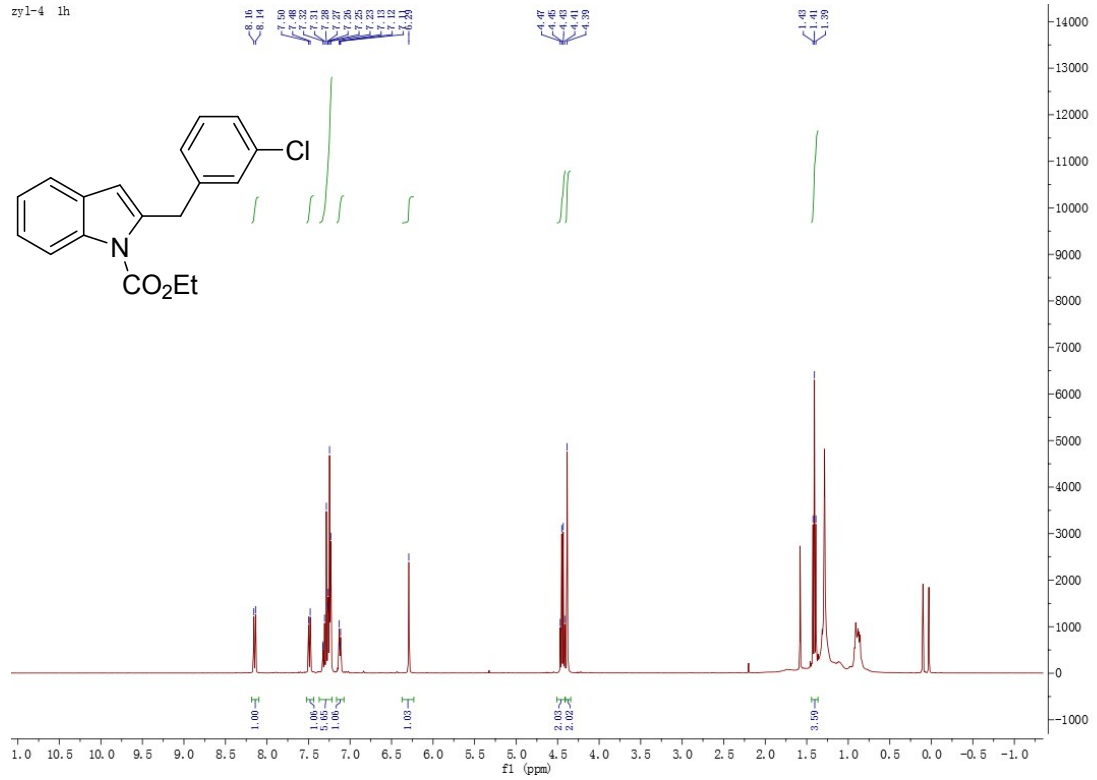

zyl-4 13c

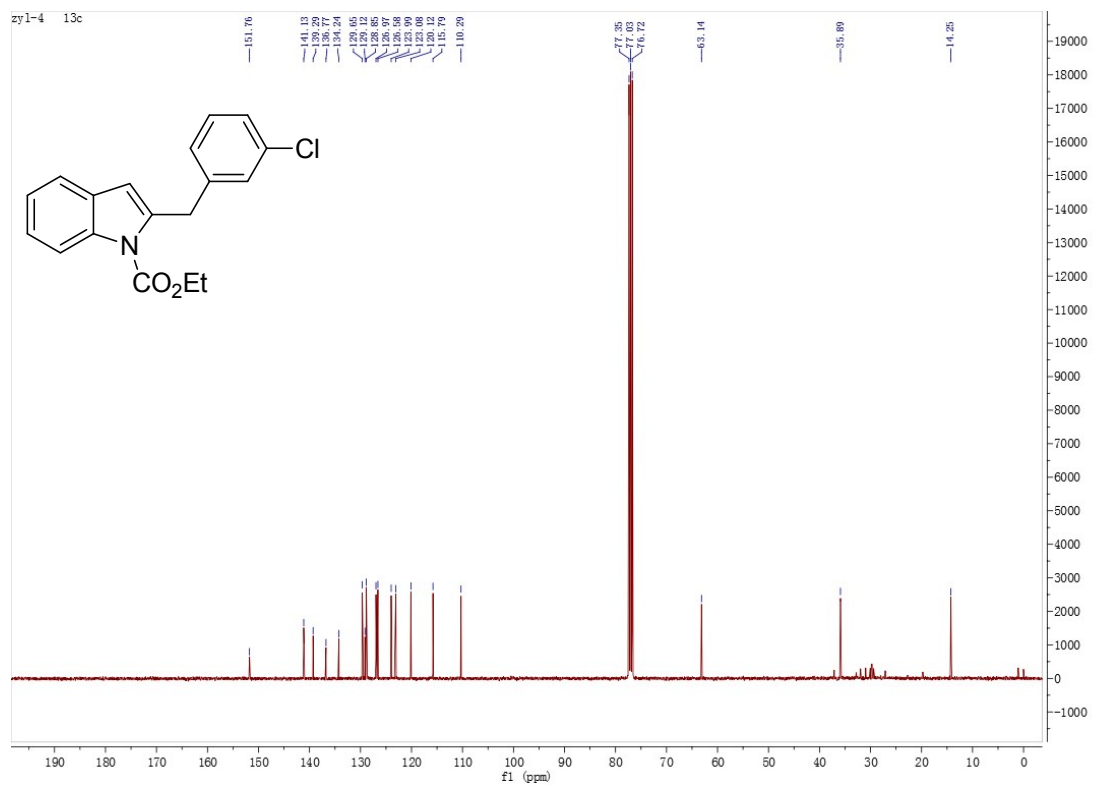

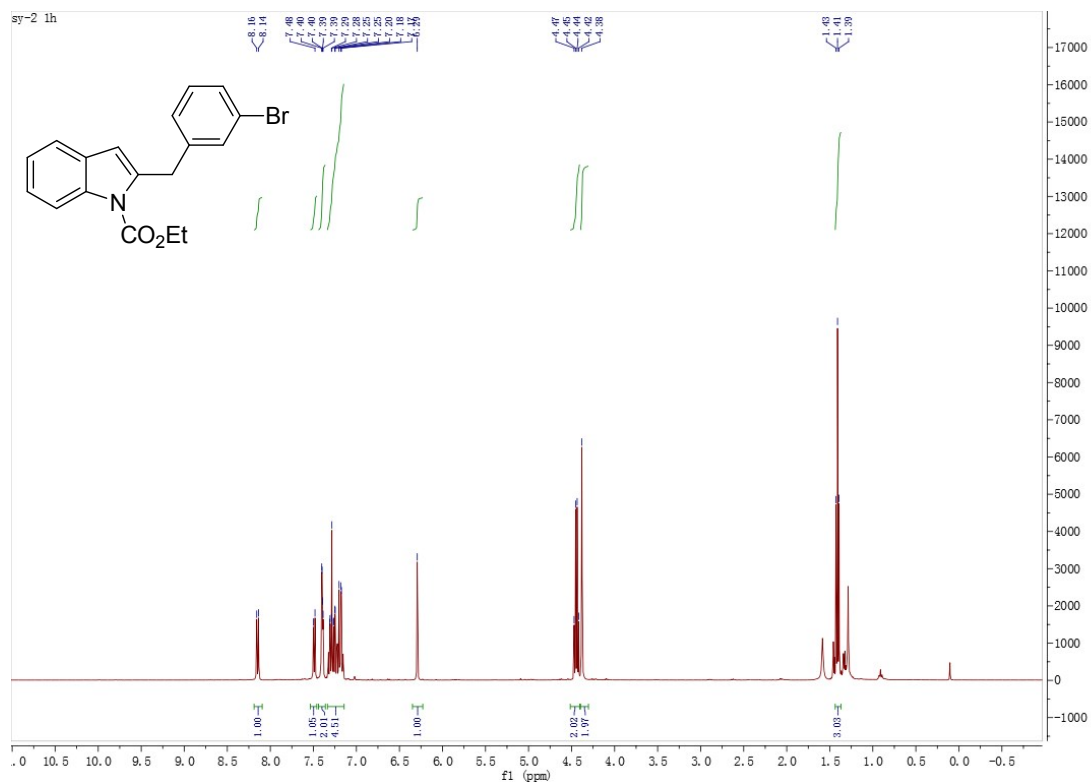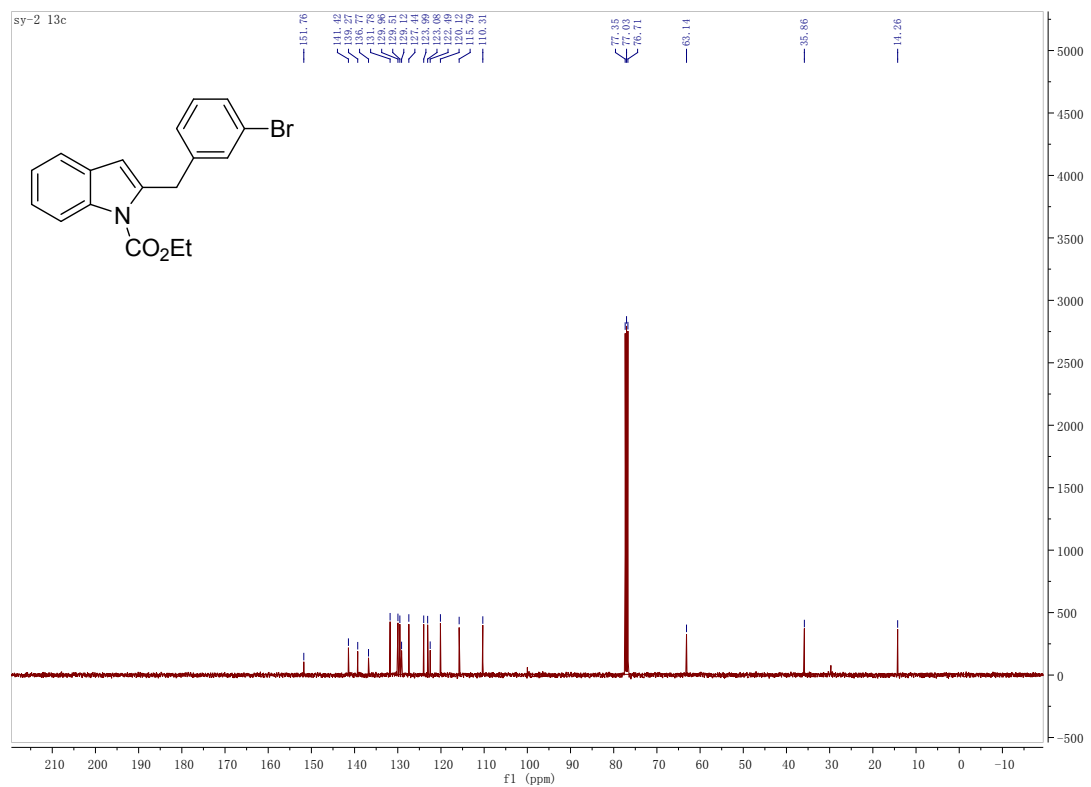



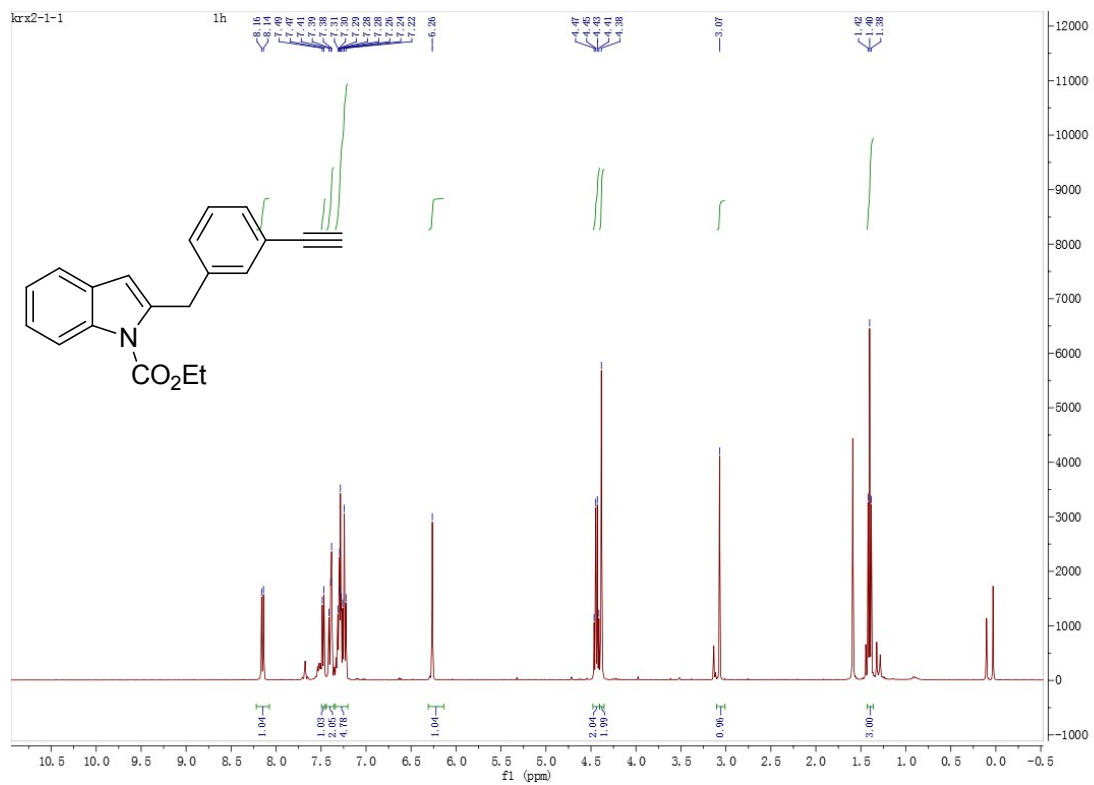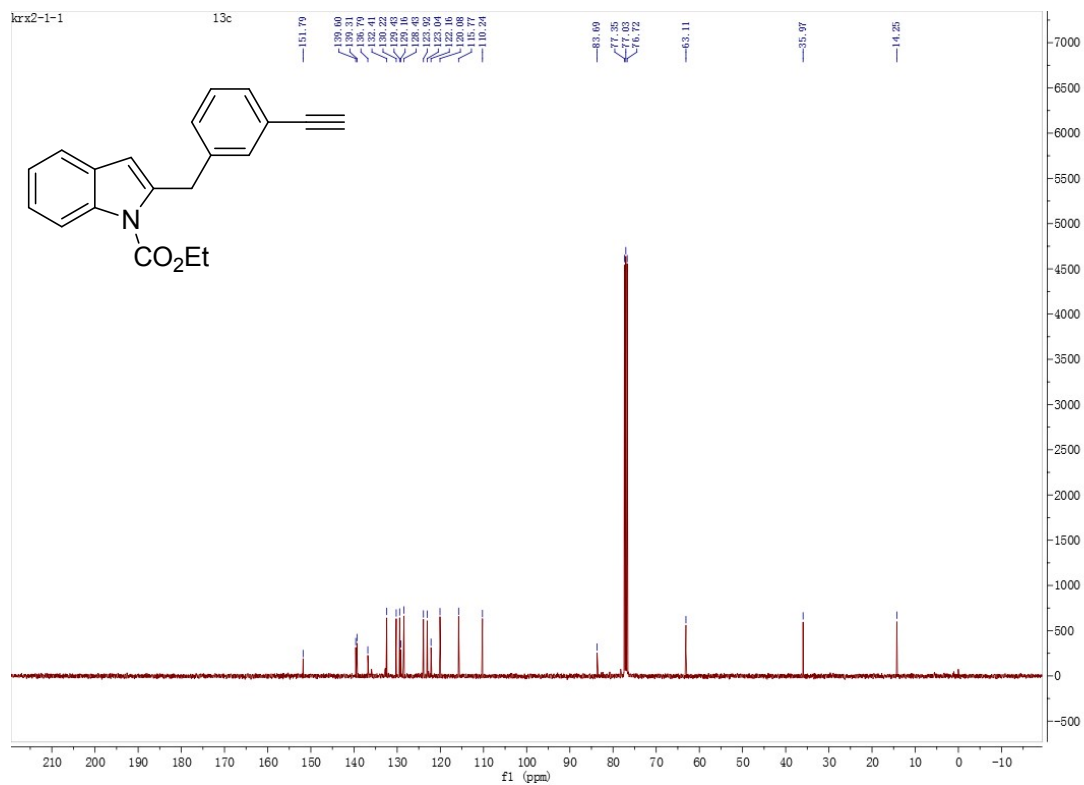

zyl-1 1h

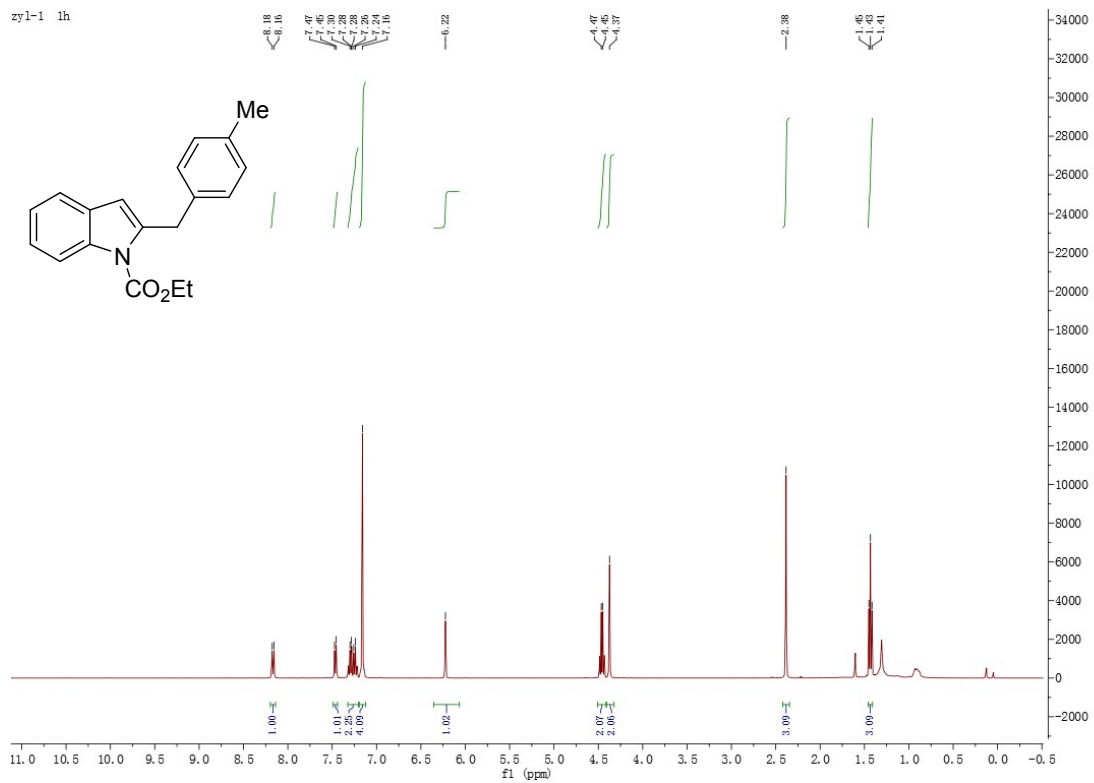

zyl-1 13c

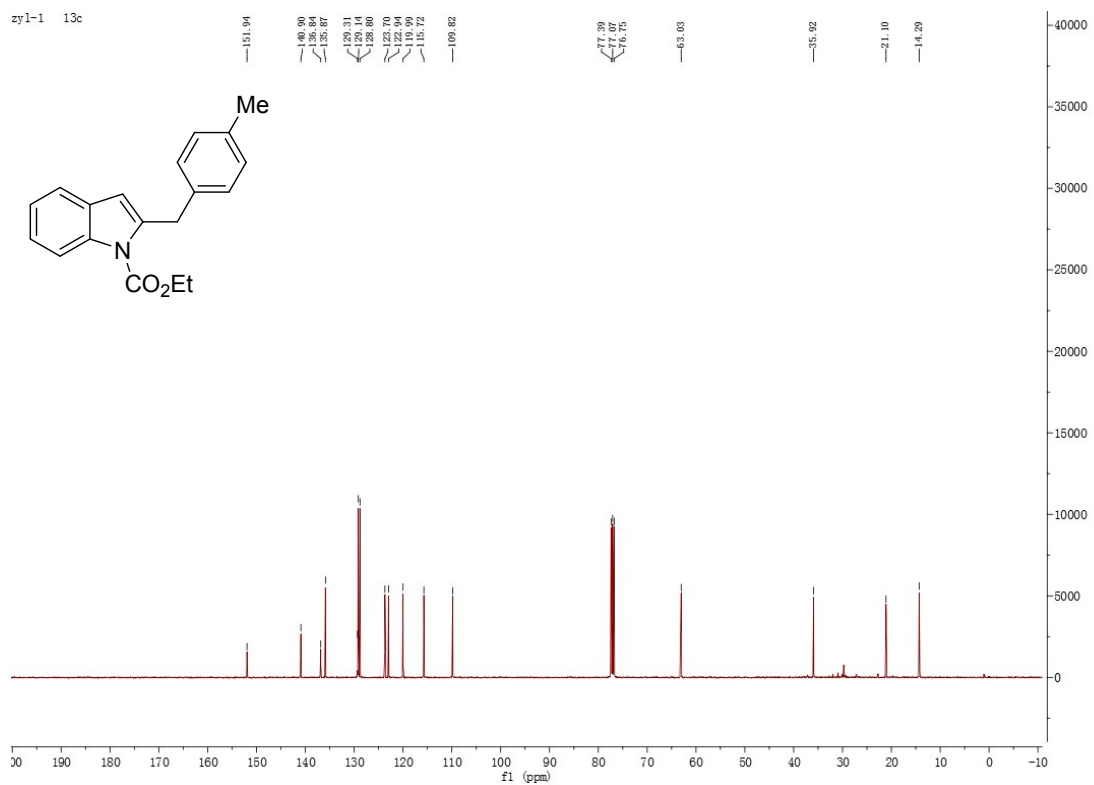

zyl-2 1h

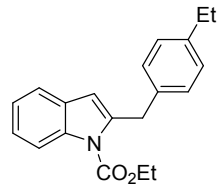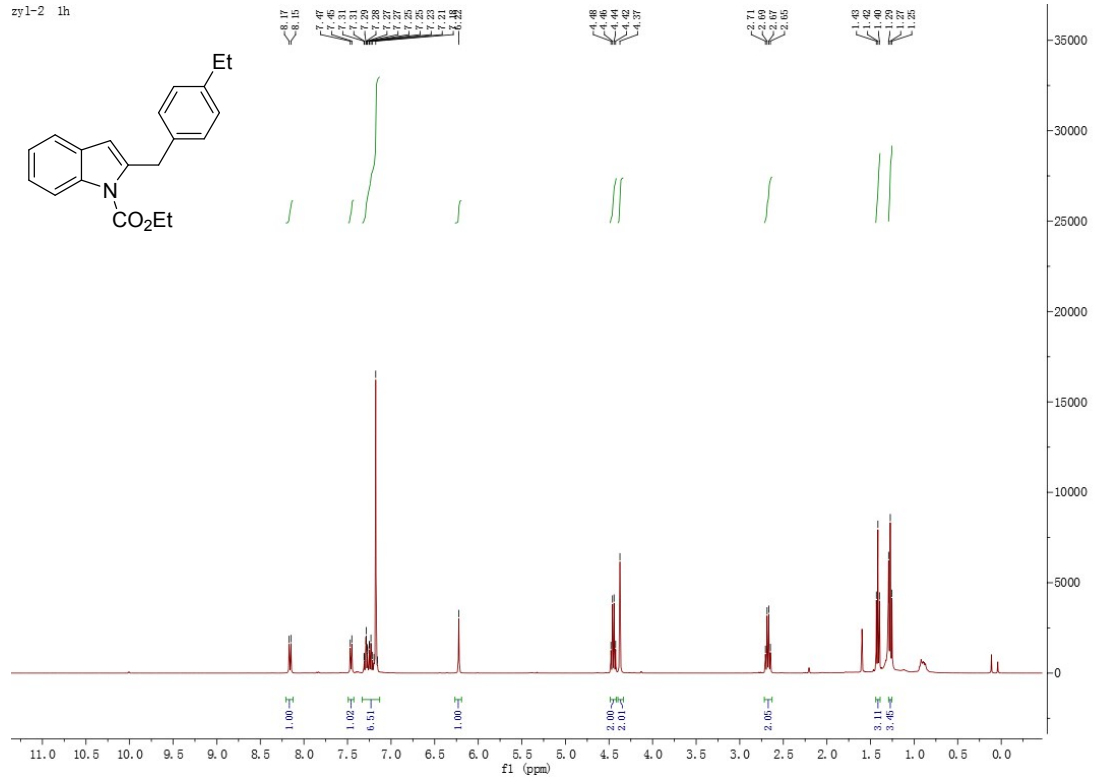

zyl-2 13c

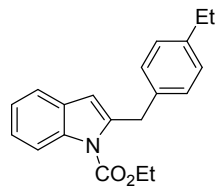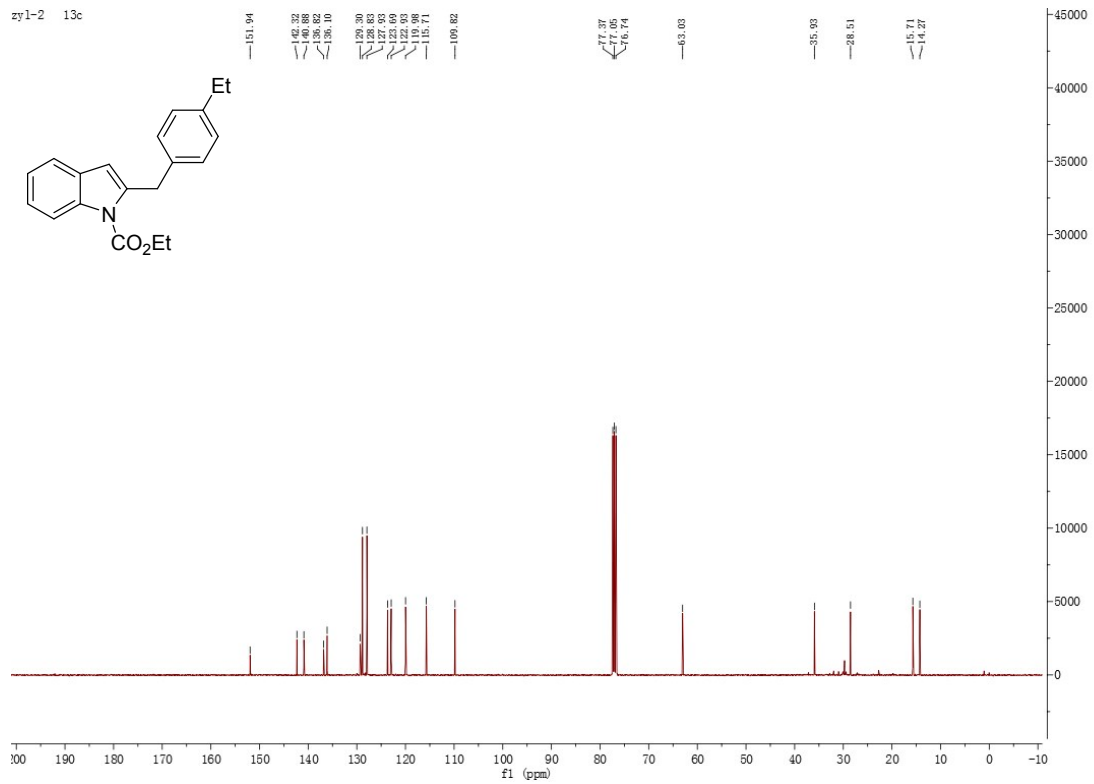

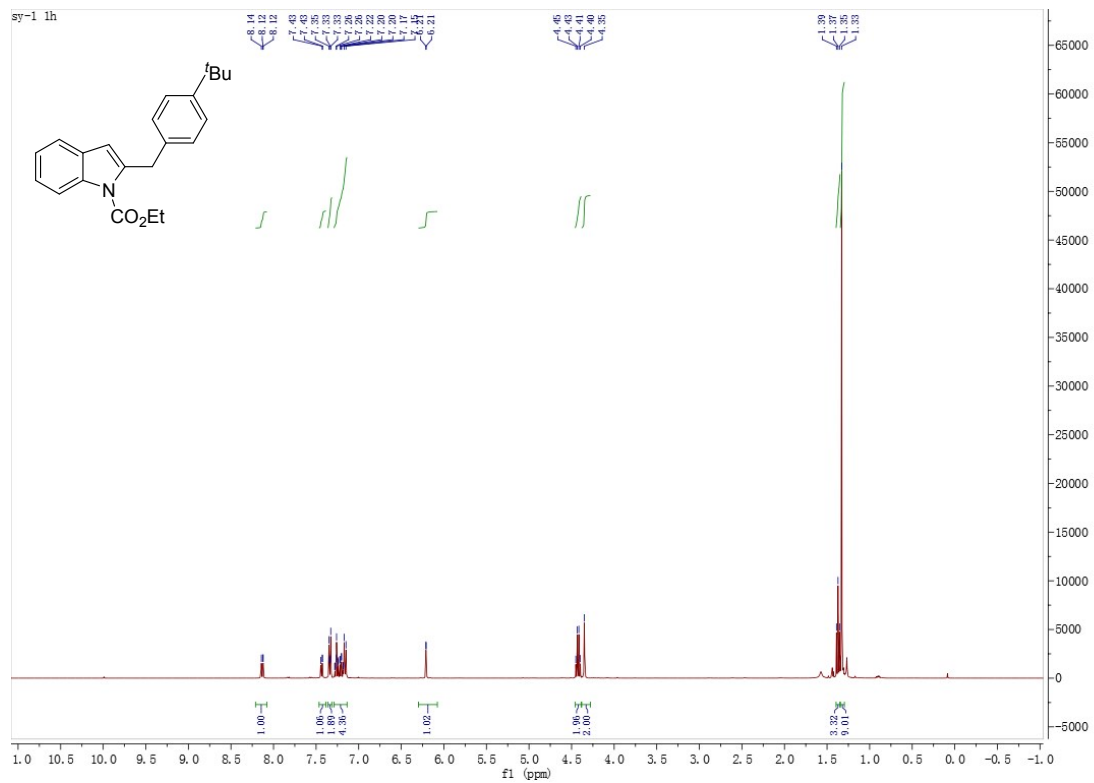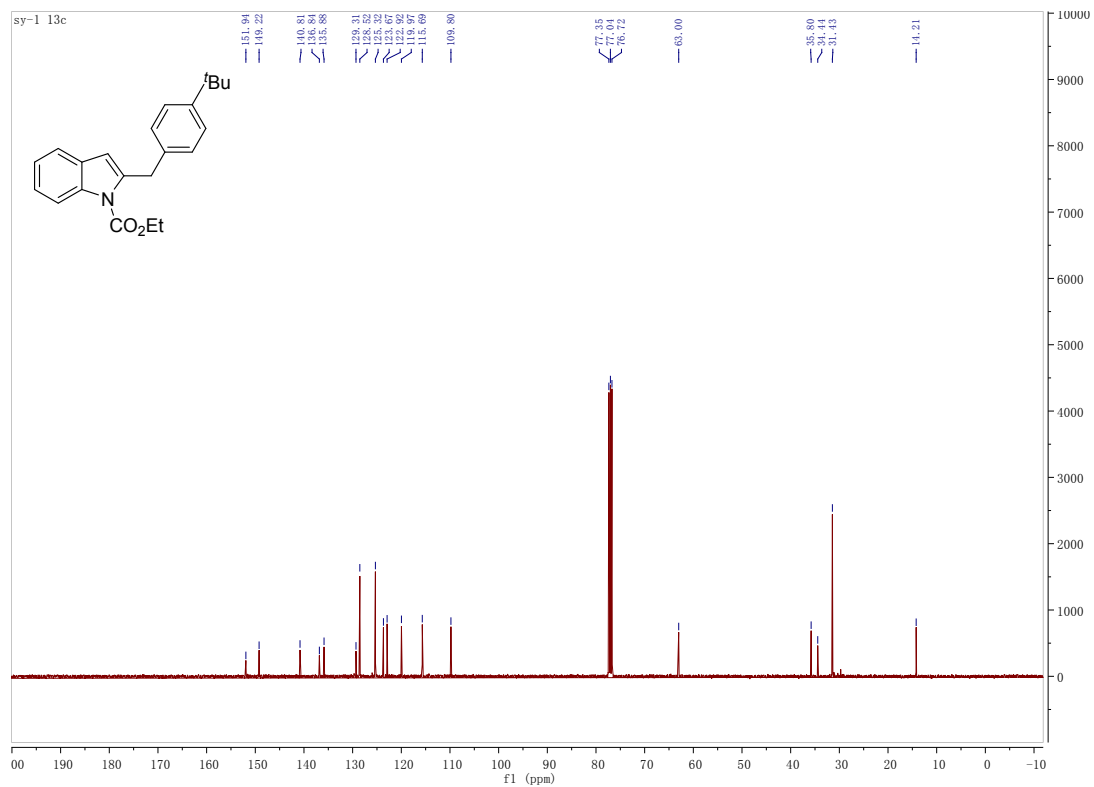

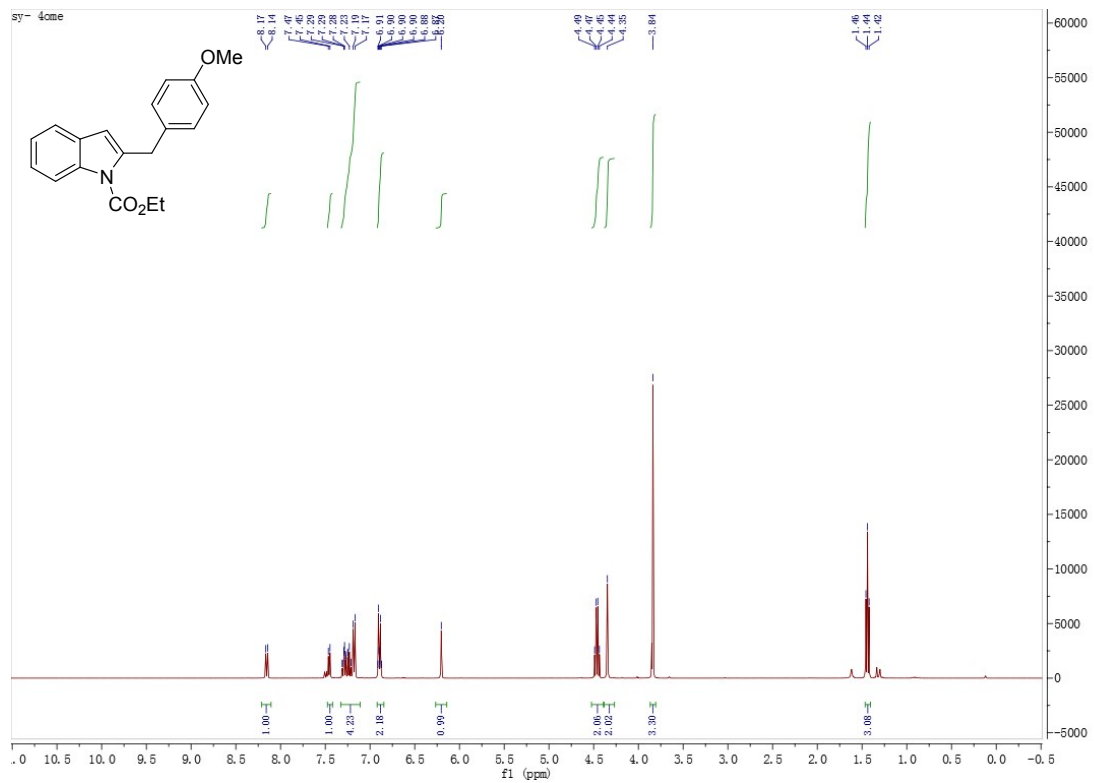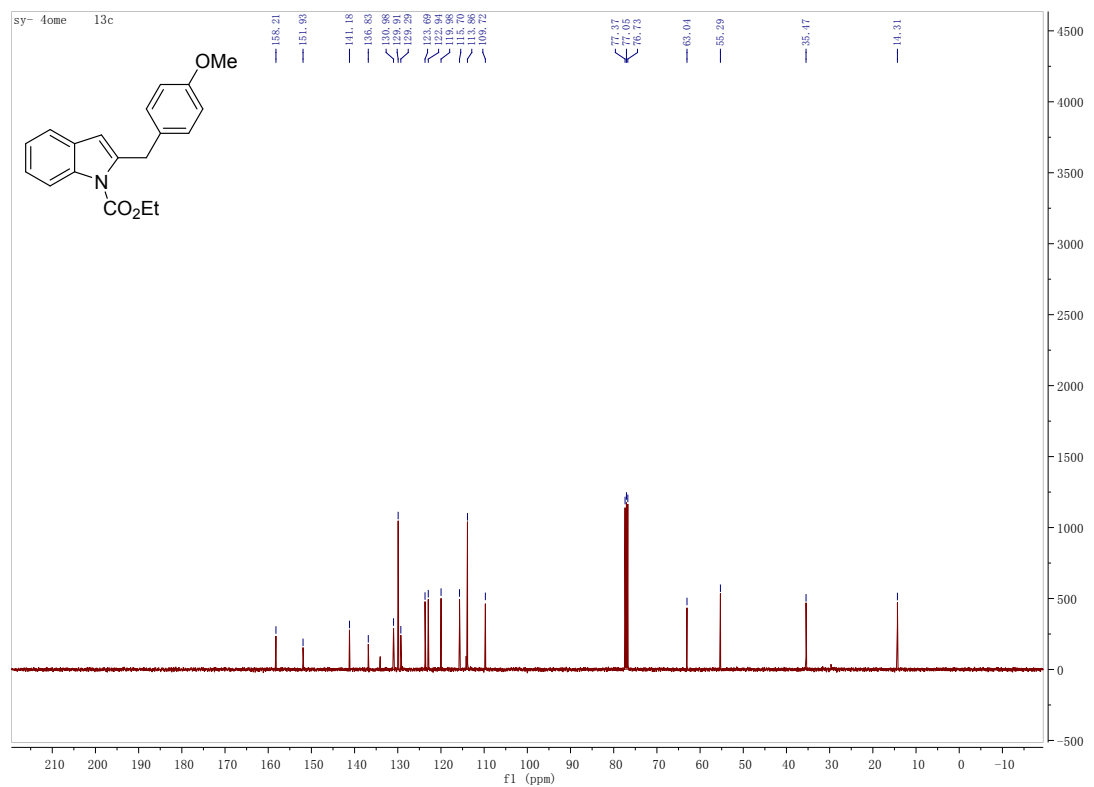

fy 4f

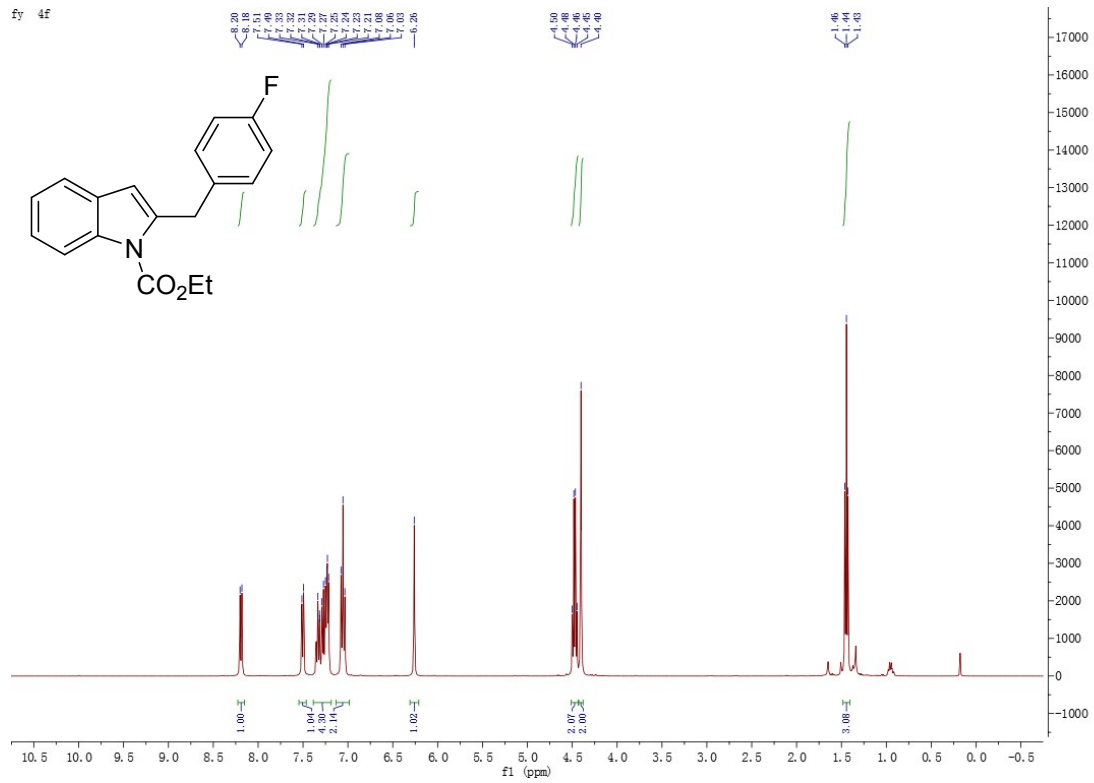

fy 4f 13c

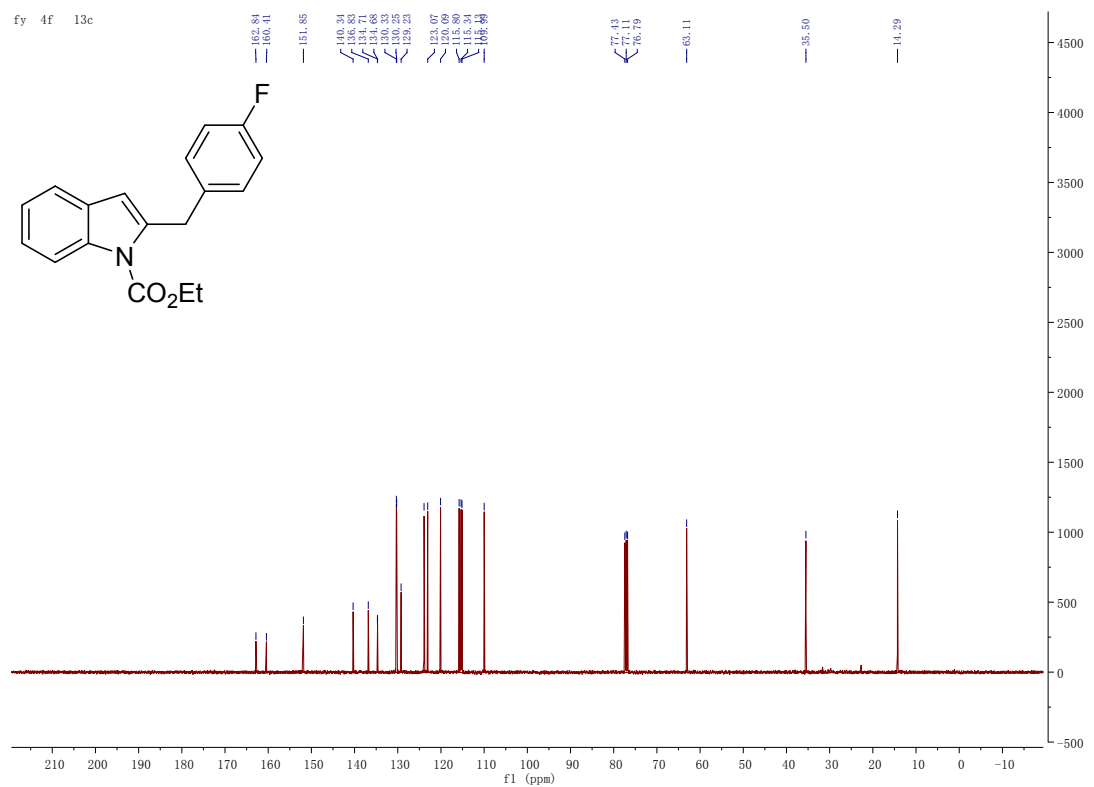

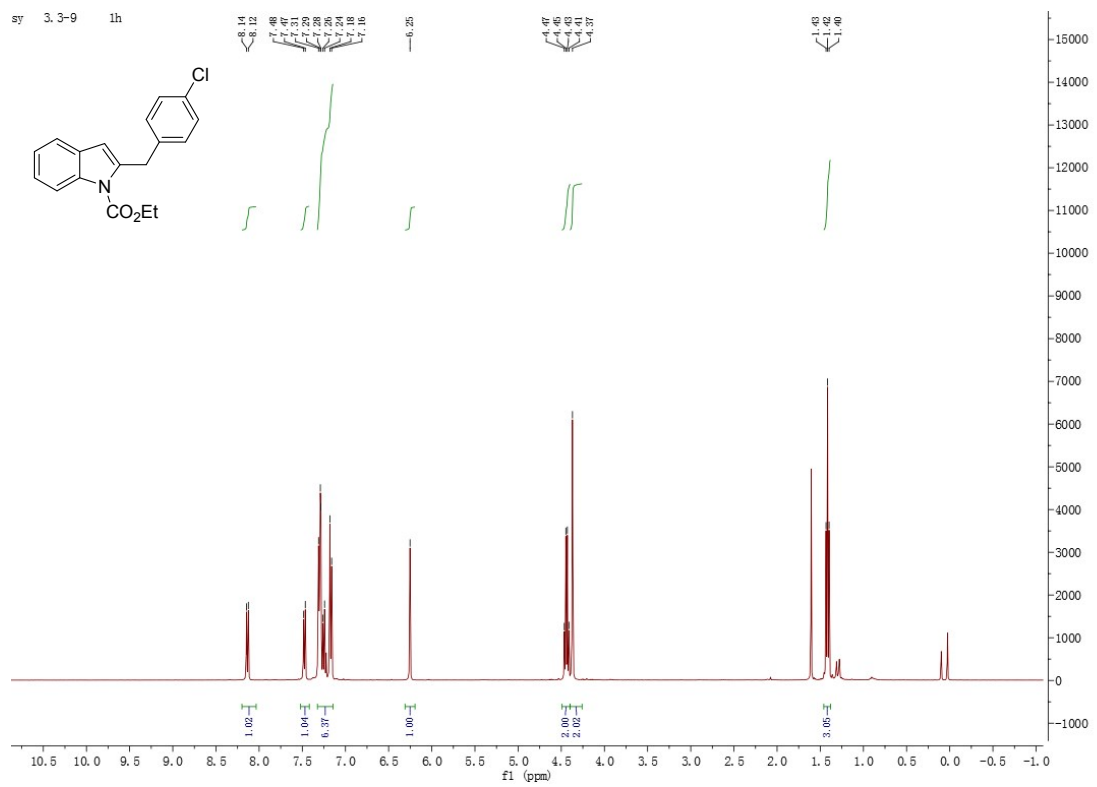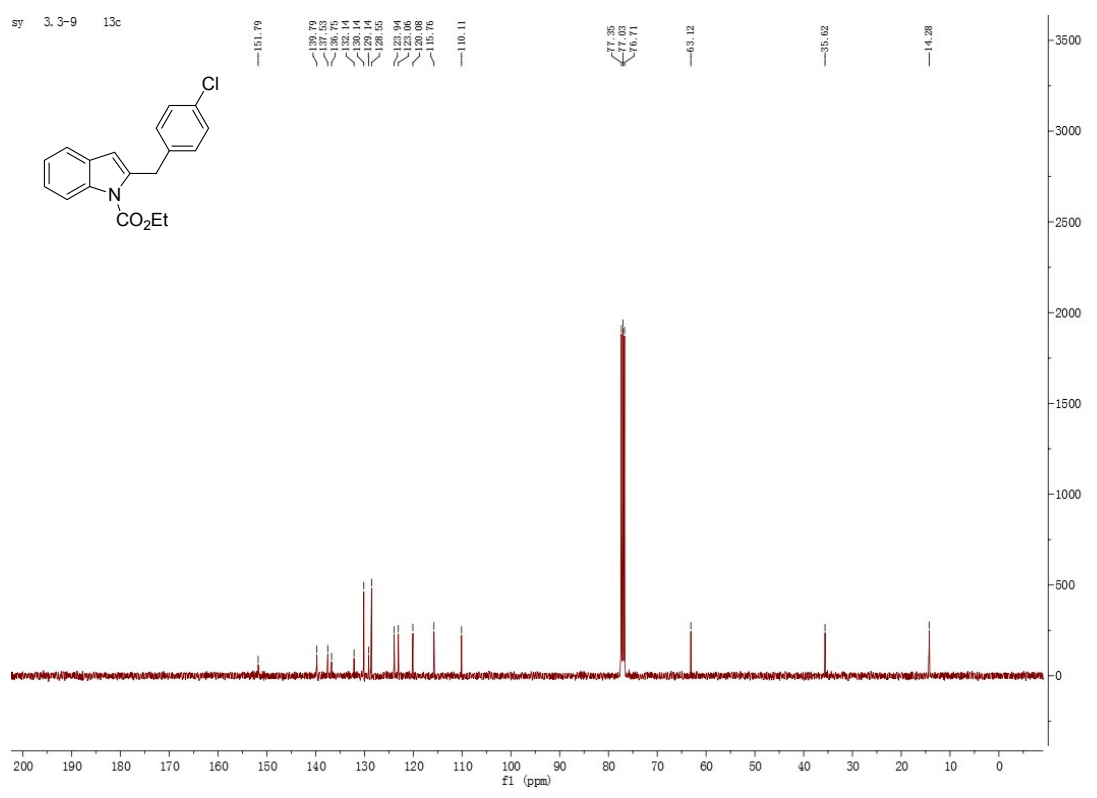

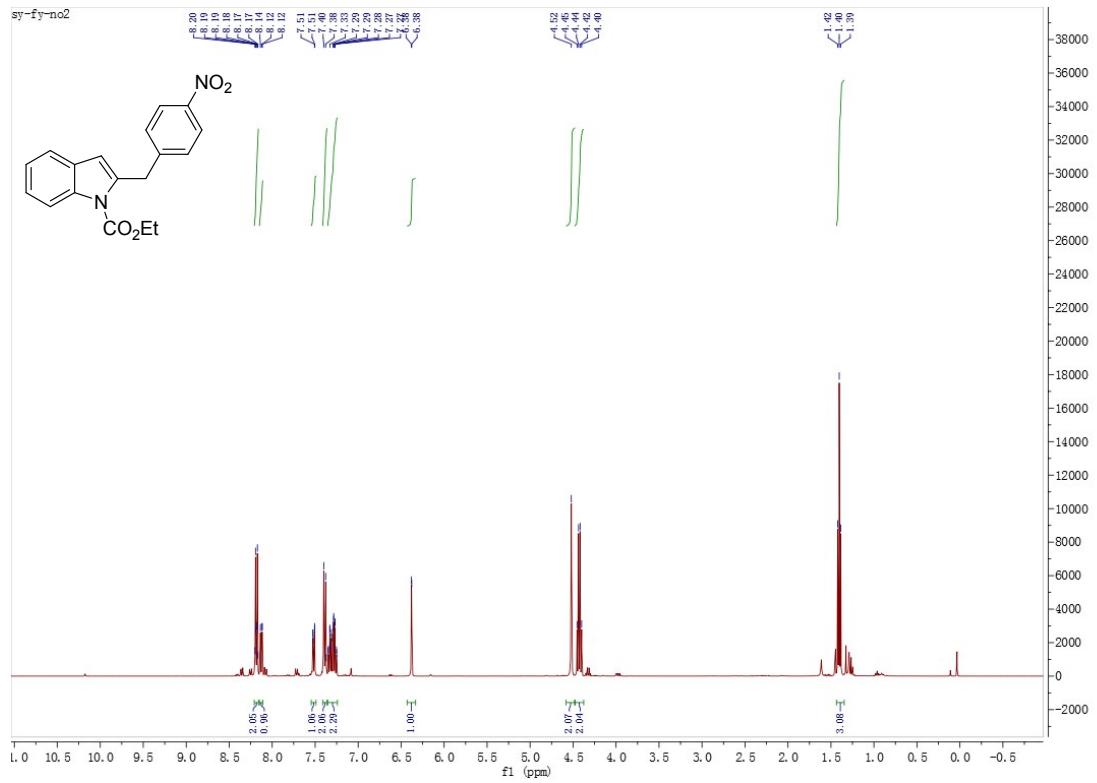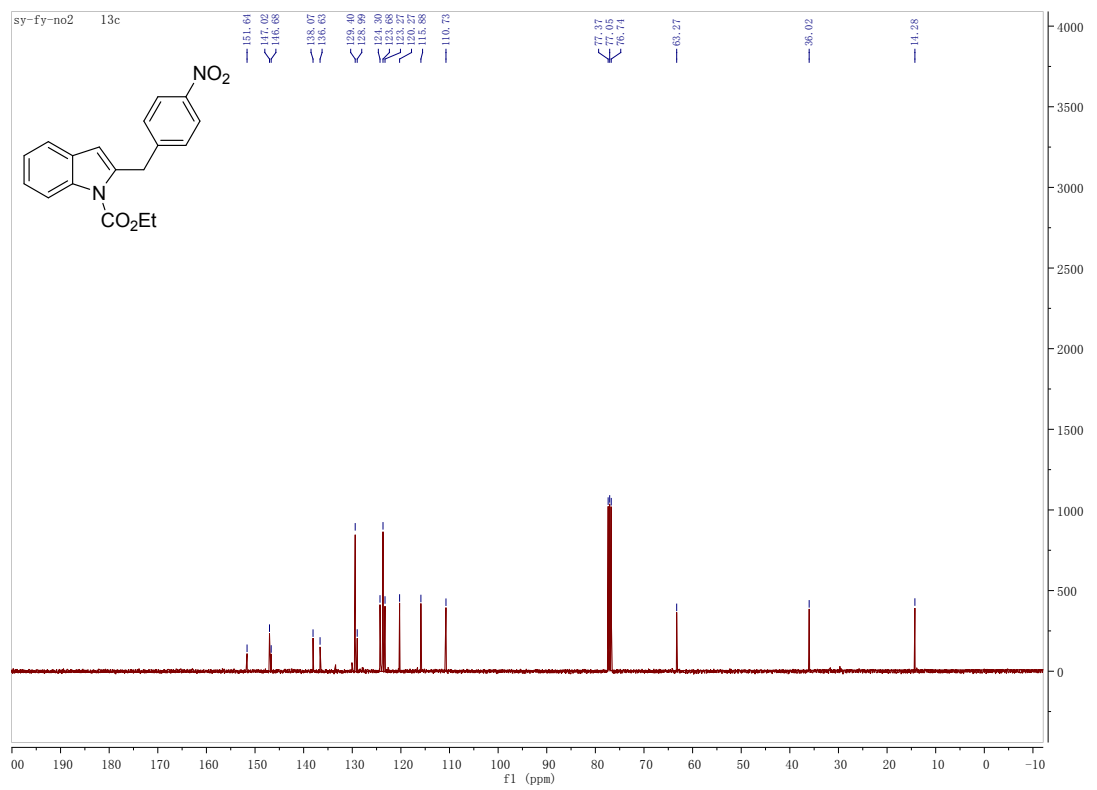



zan3-1

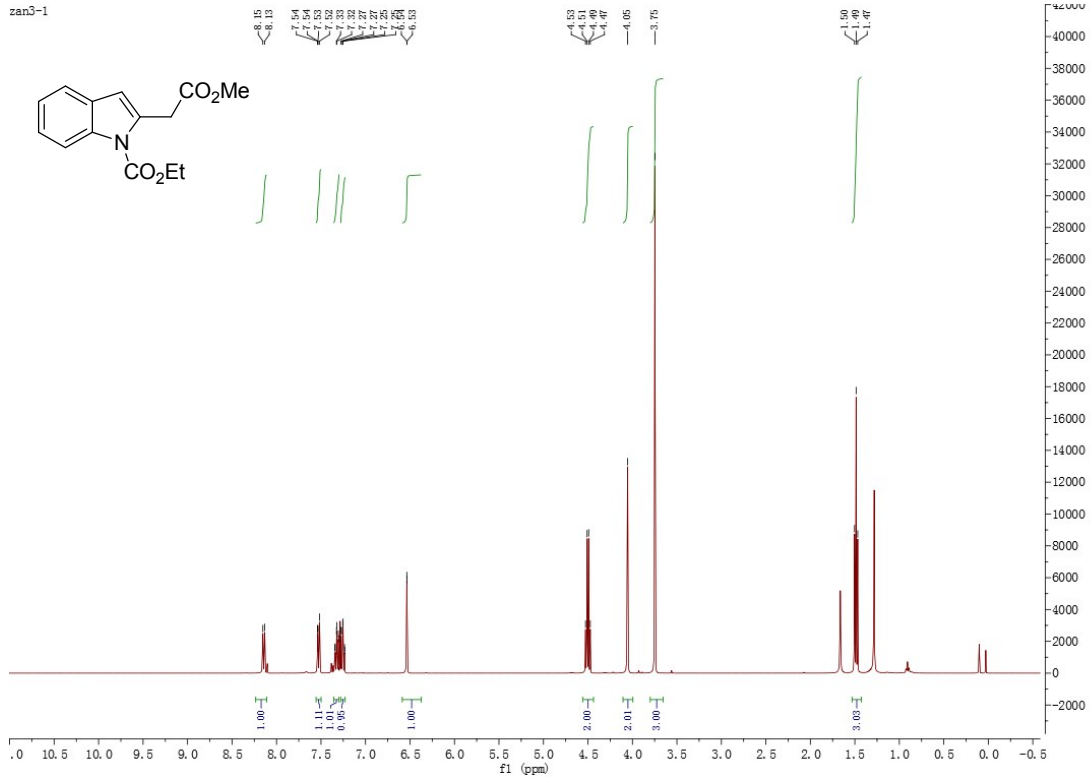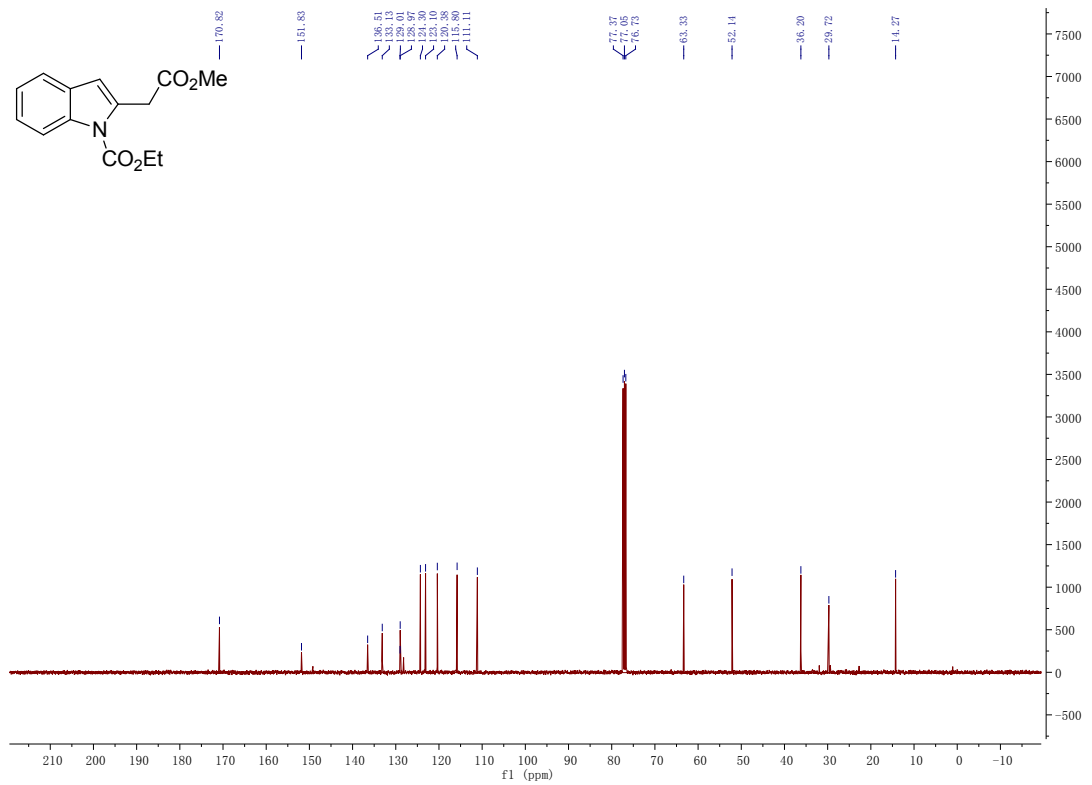

zn-4

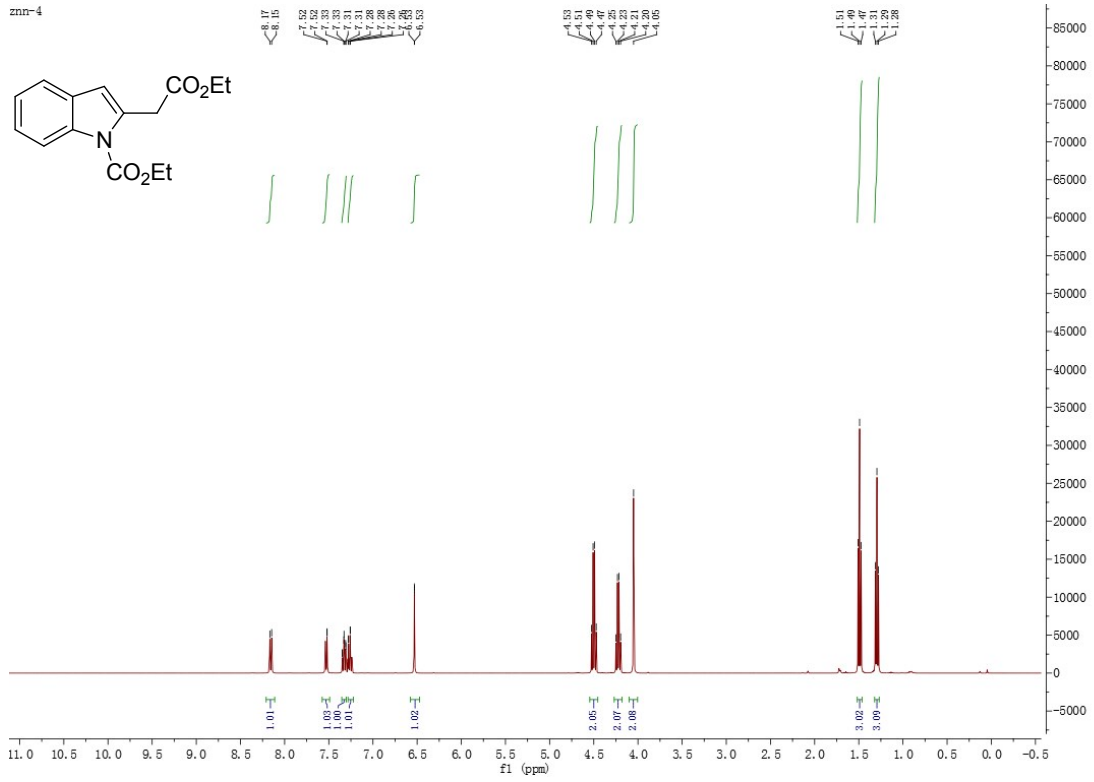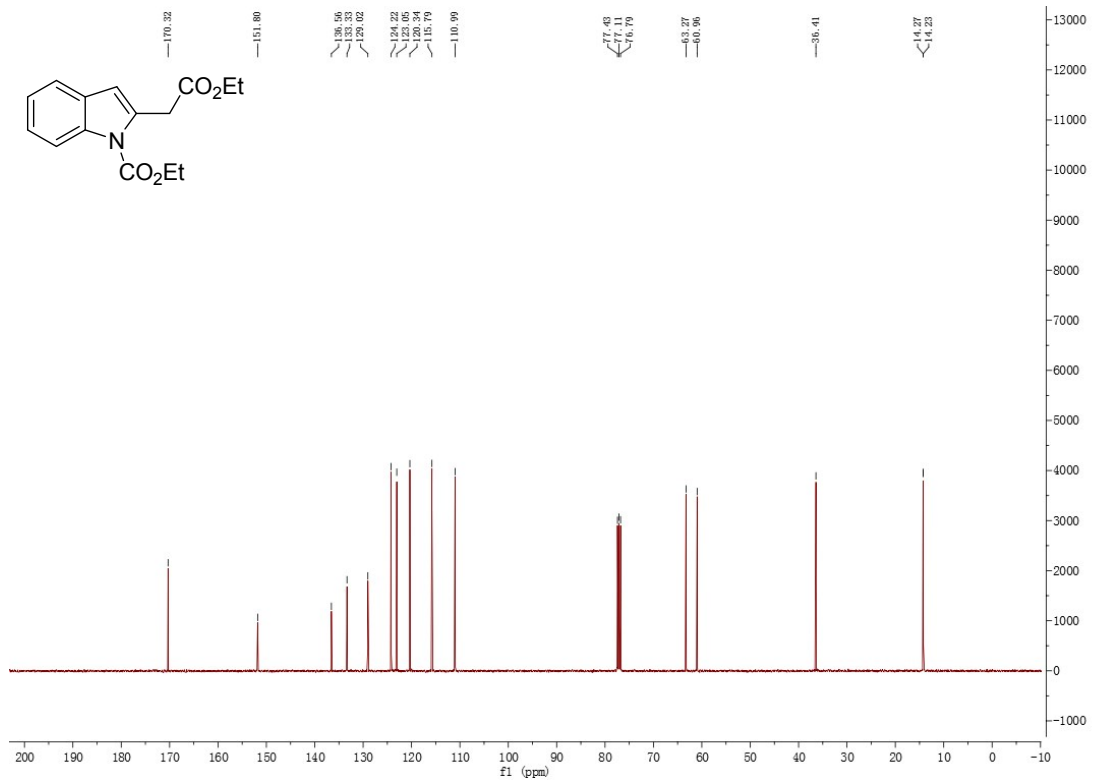

sy8-1-1h

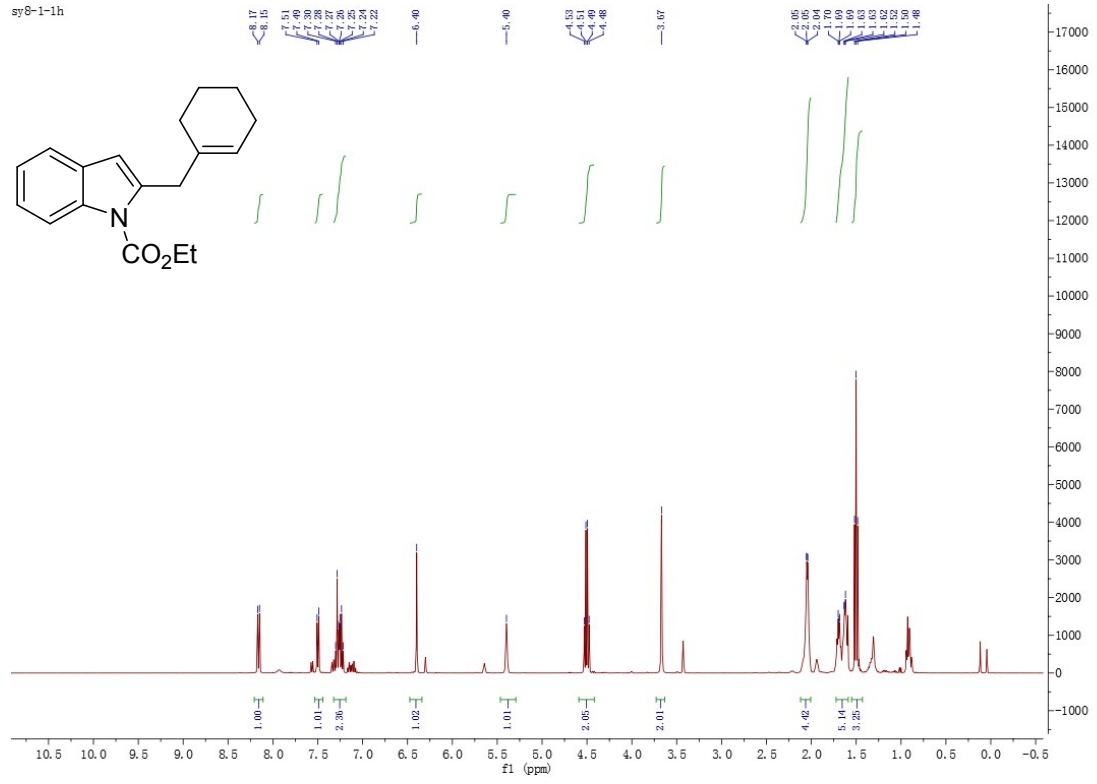

sy8-1-13c

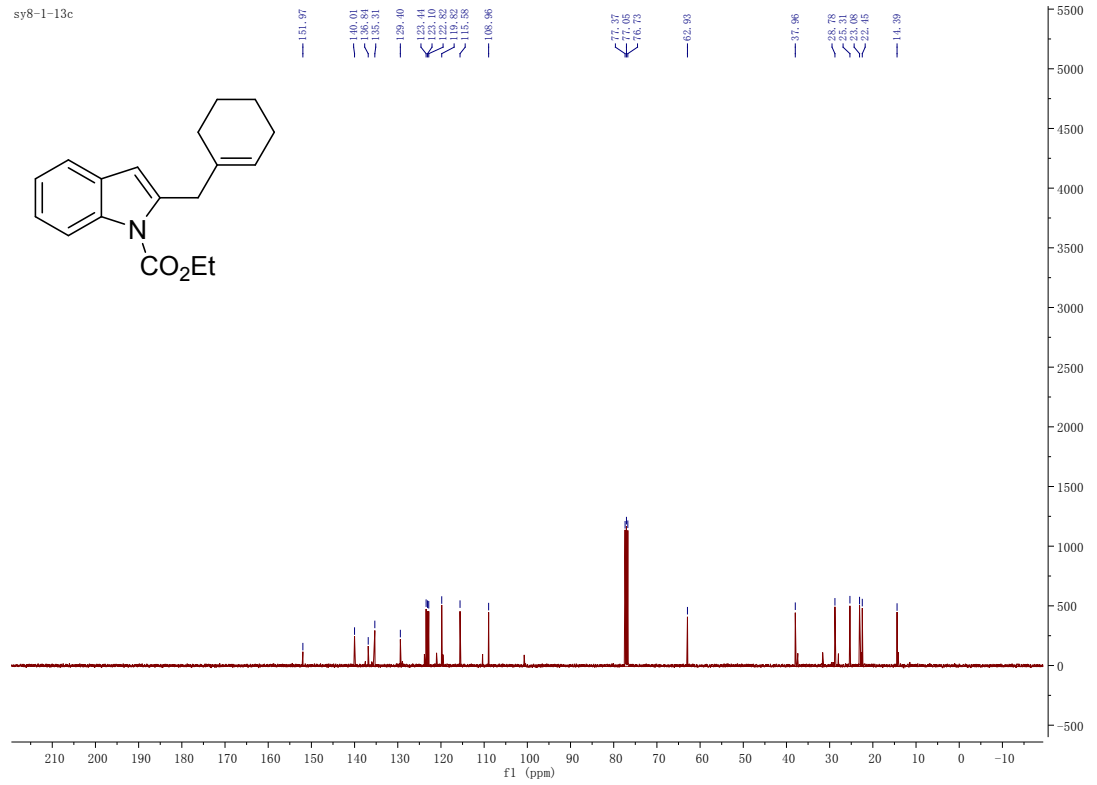

saifenque 1h

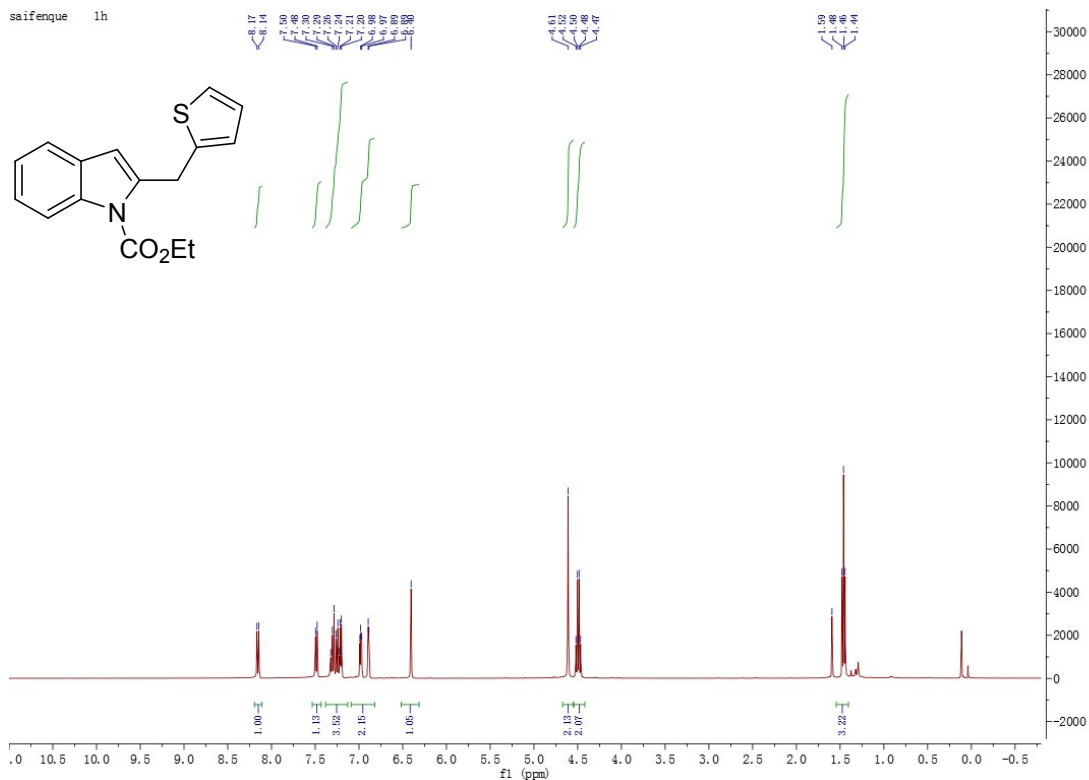

saifenque 13c

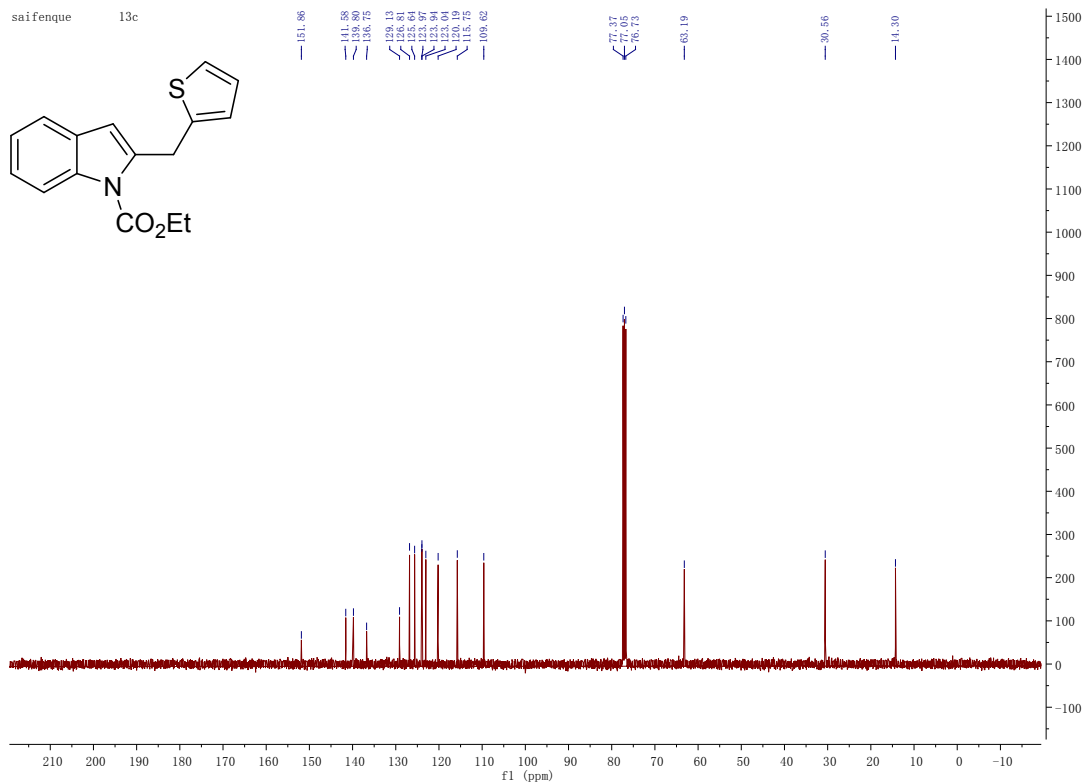

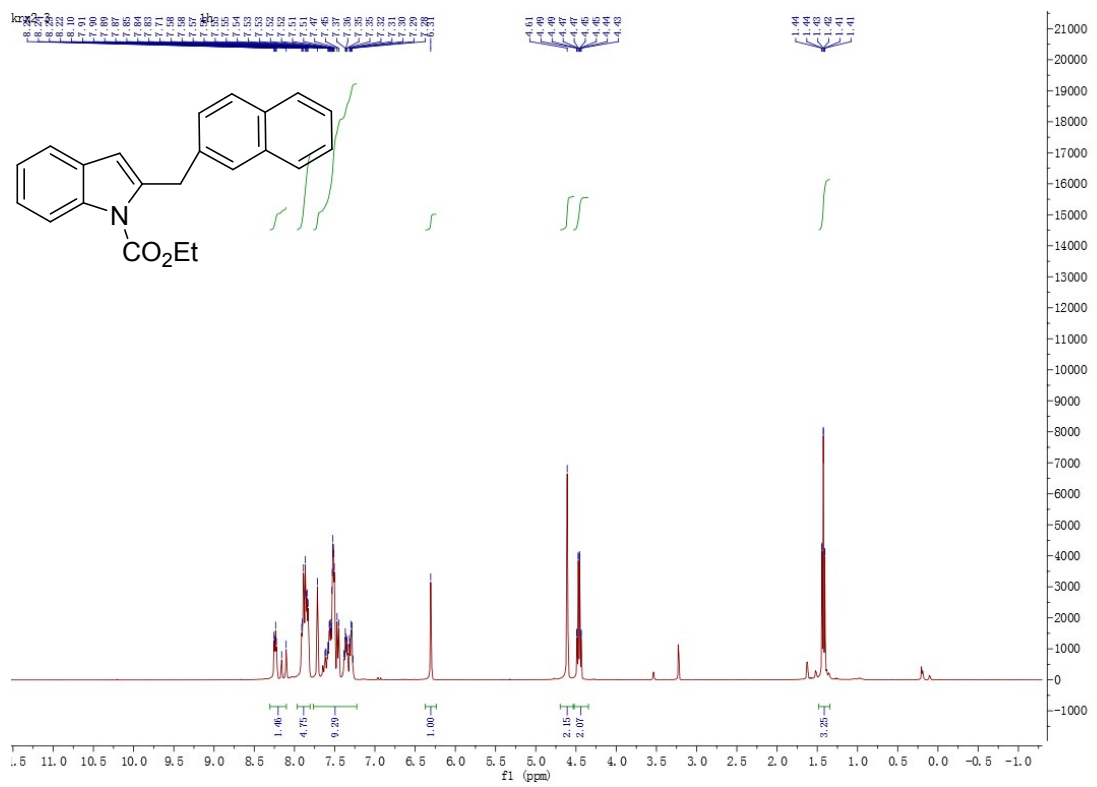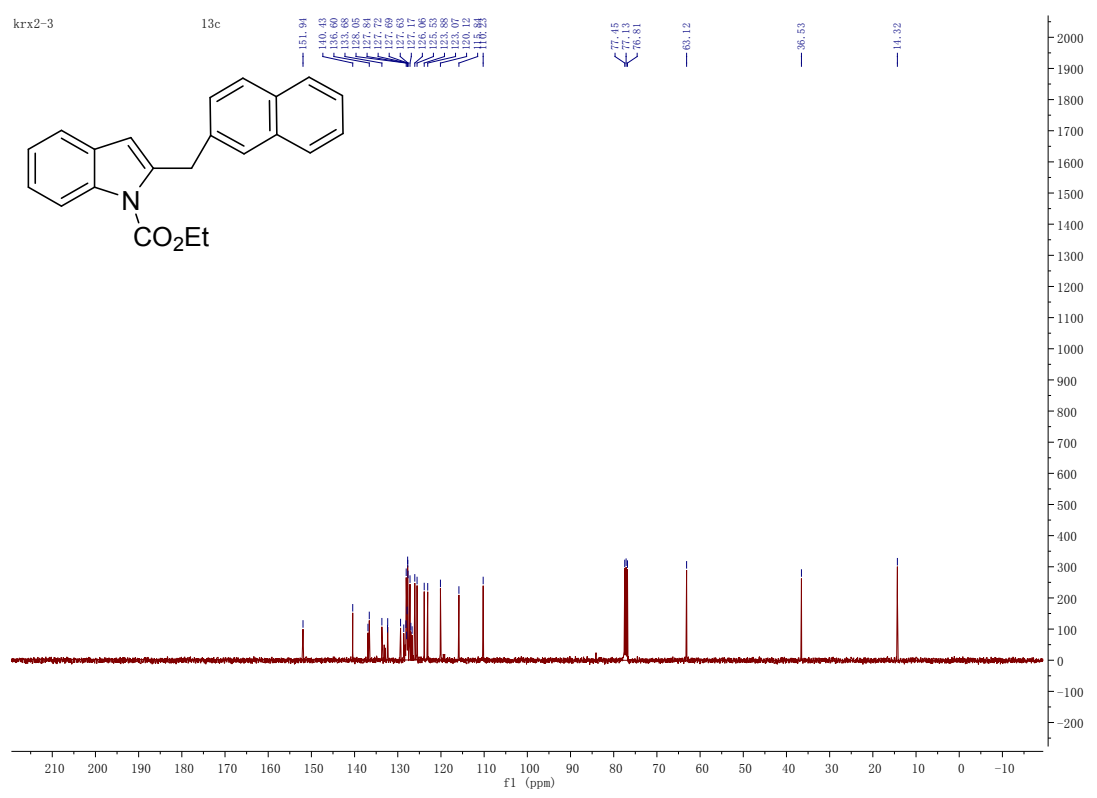

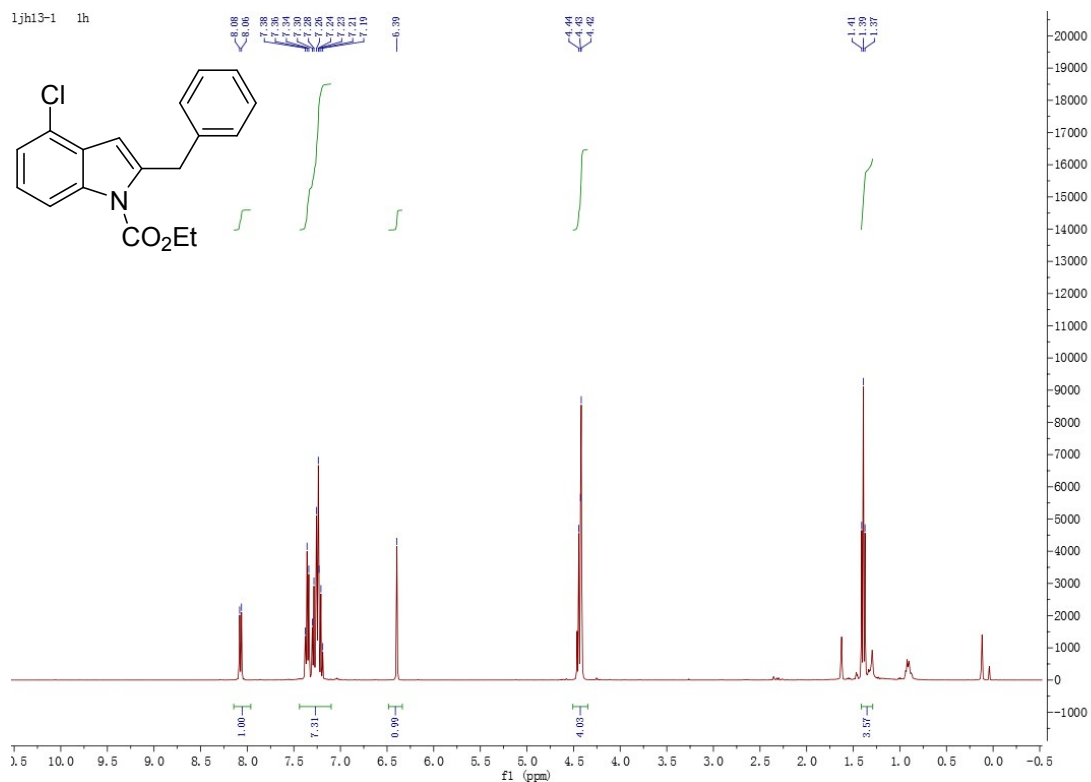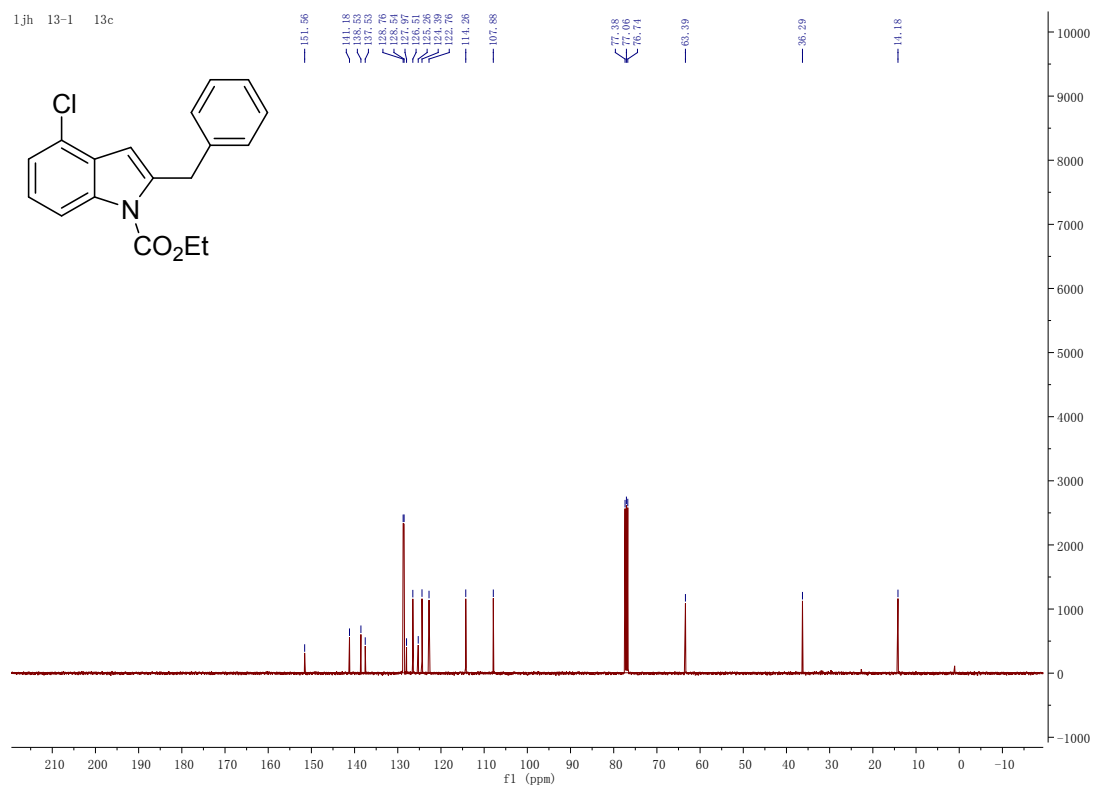

LJH 14-2 1h

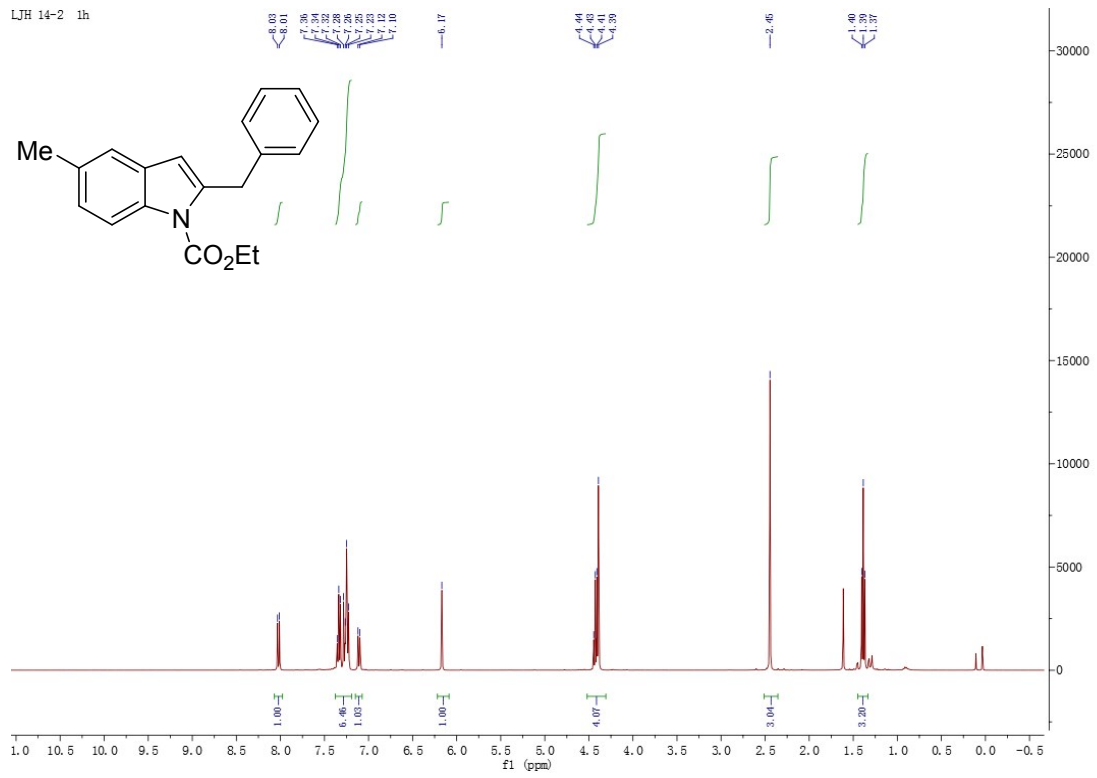

1jh 14-2 13c

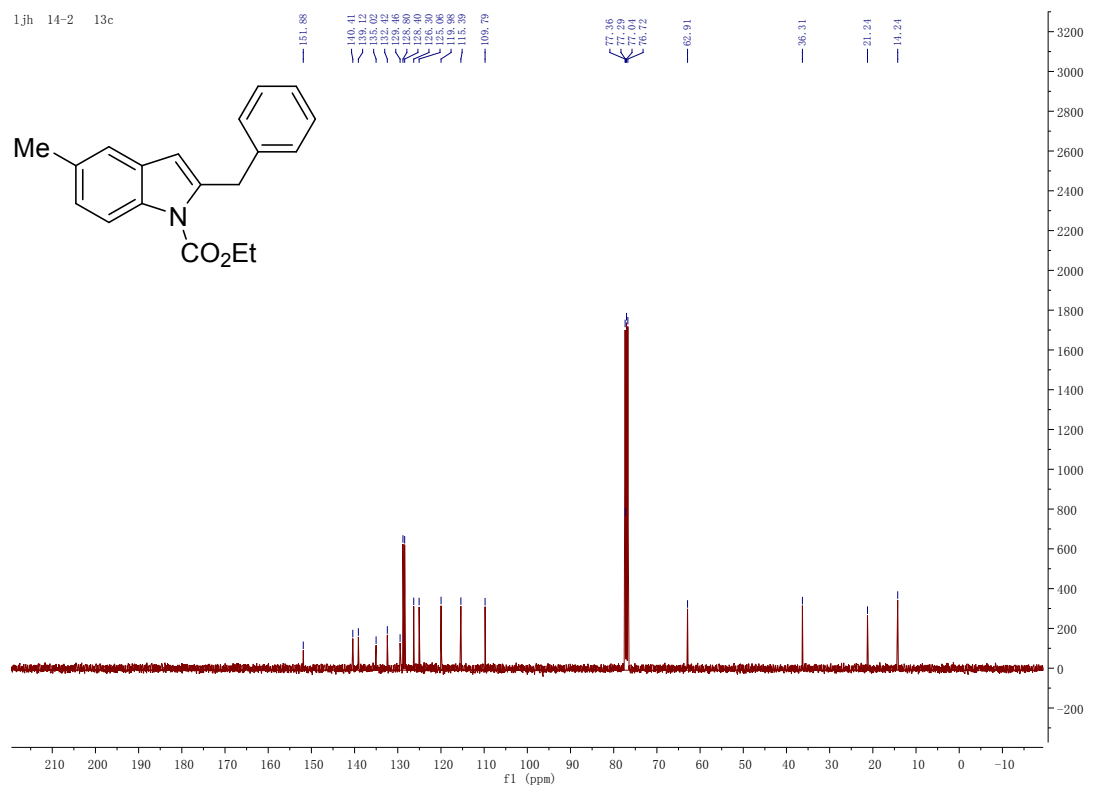

1jh 15-1 1h

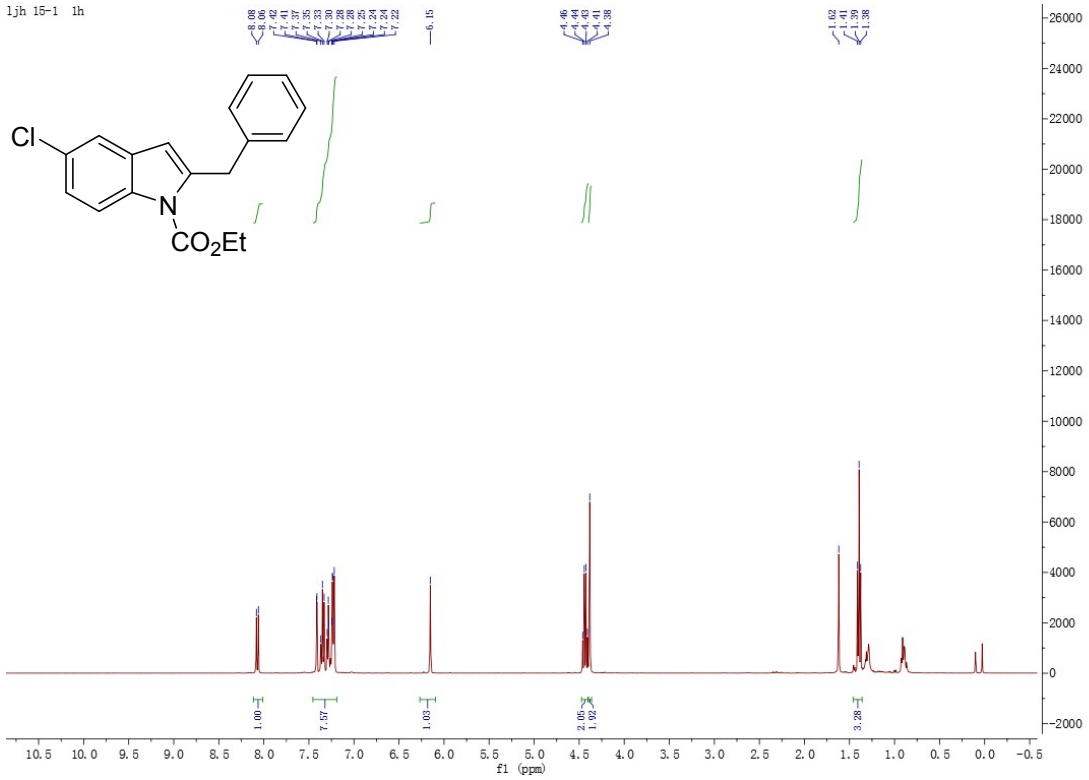

1jh 15-1 13c

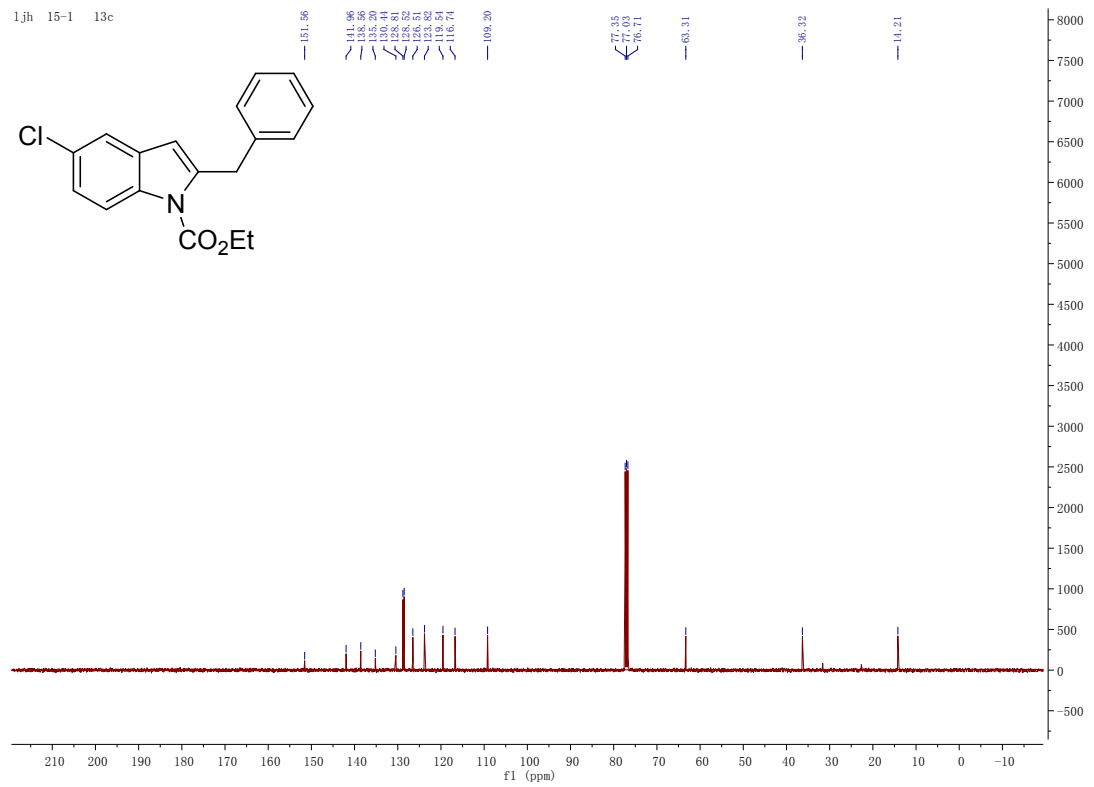



ljh 14-1 1h

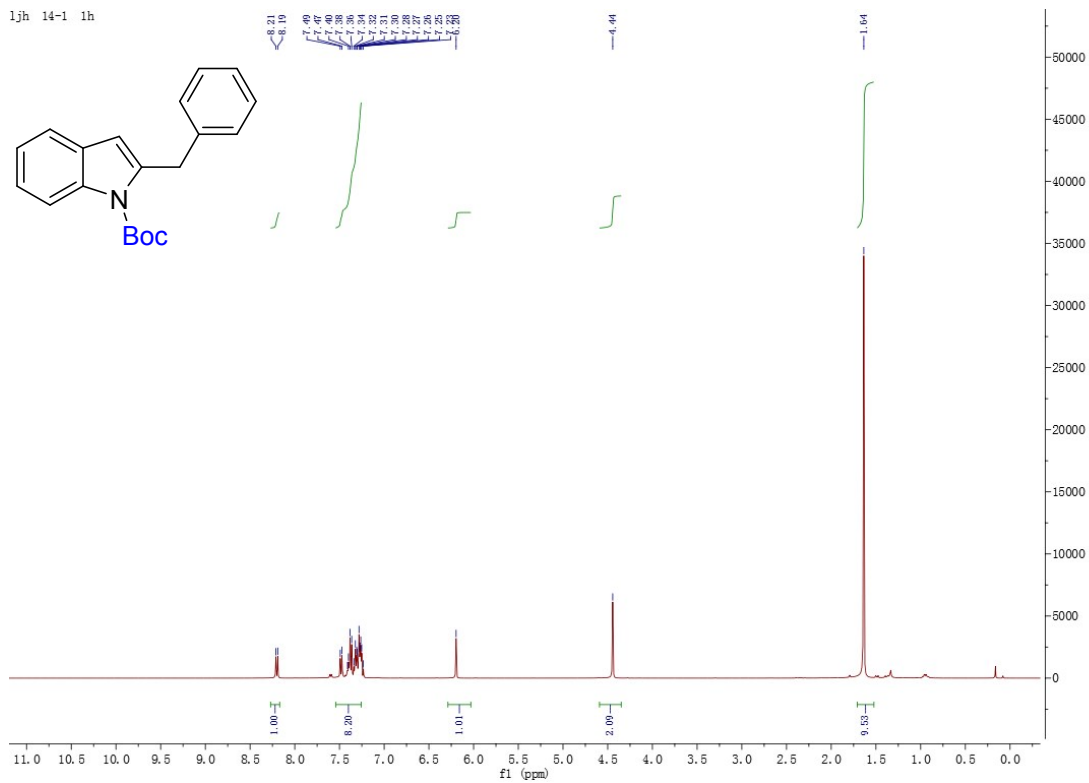

ljh 14-1 13c

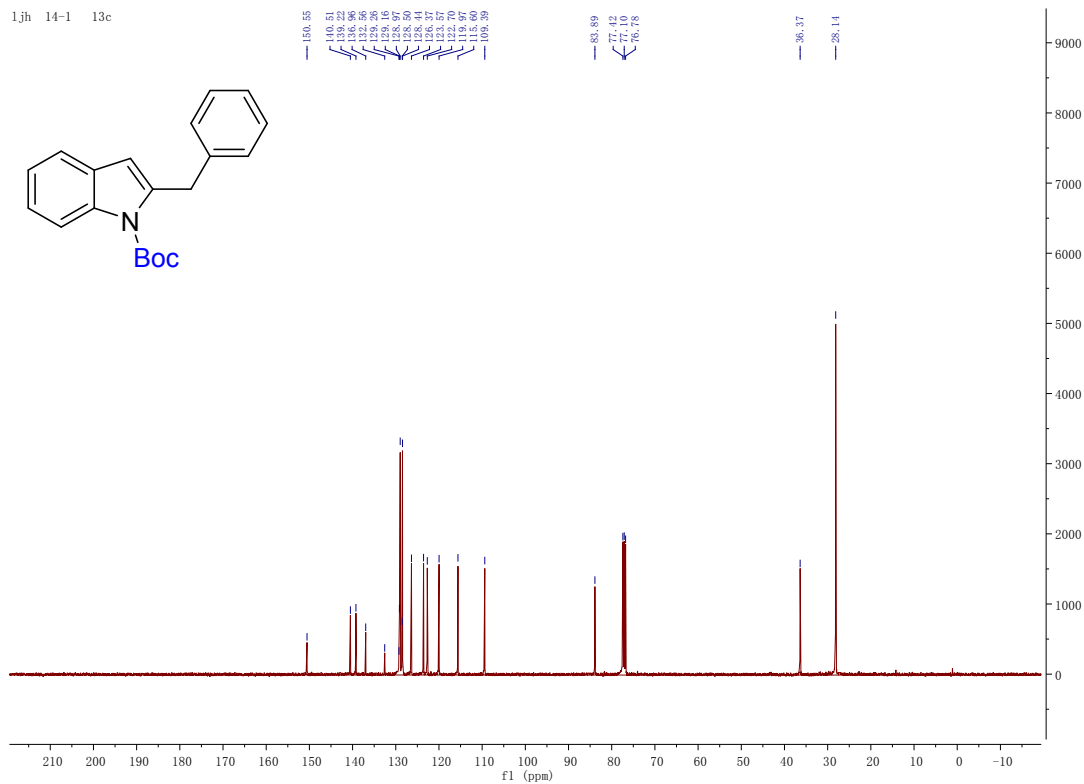

sy7. 29

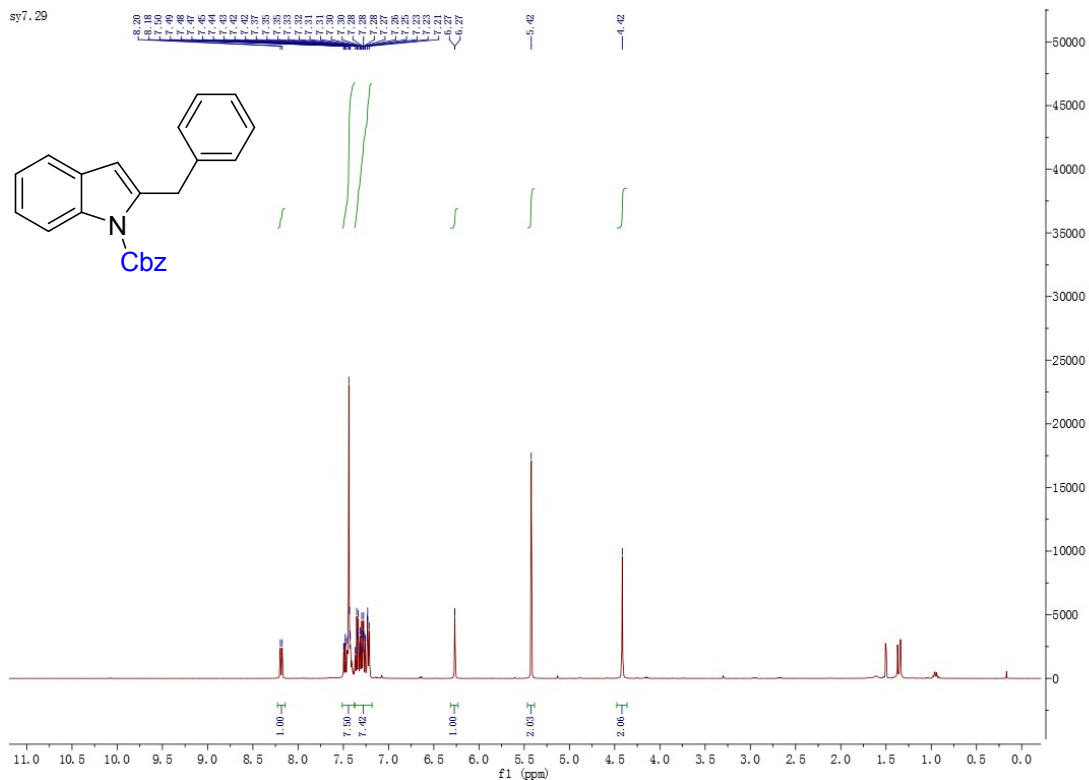

sy-fy-cbz 13c

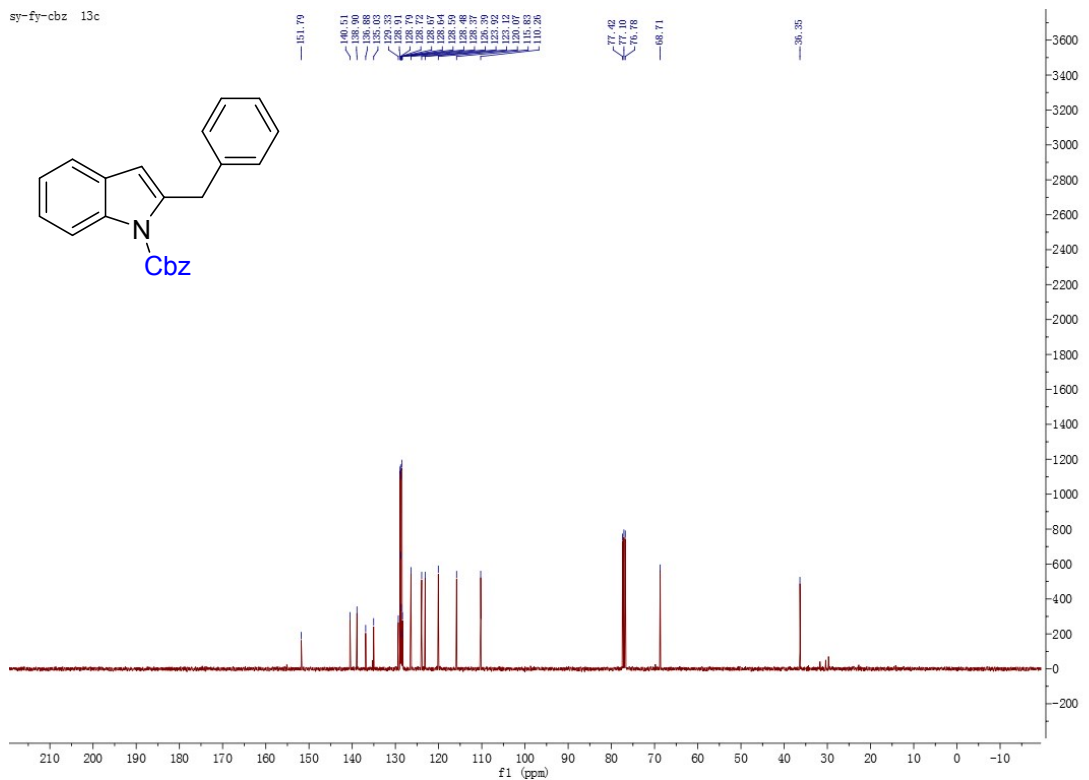

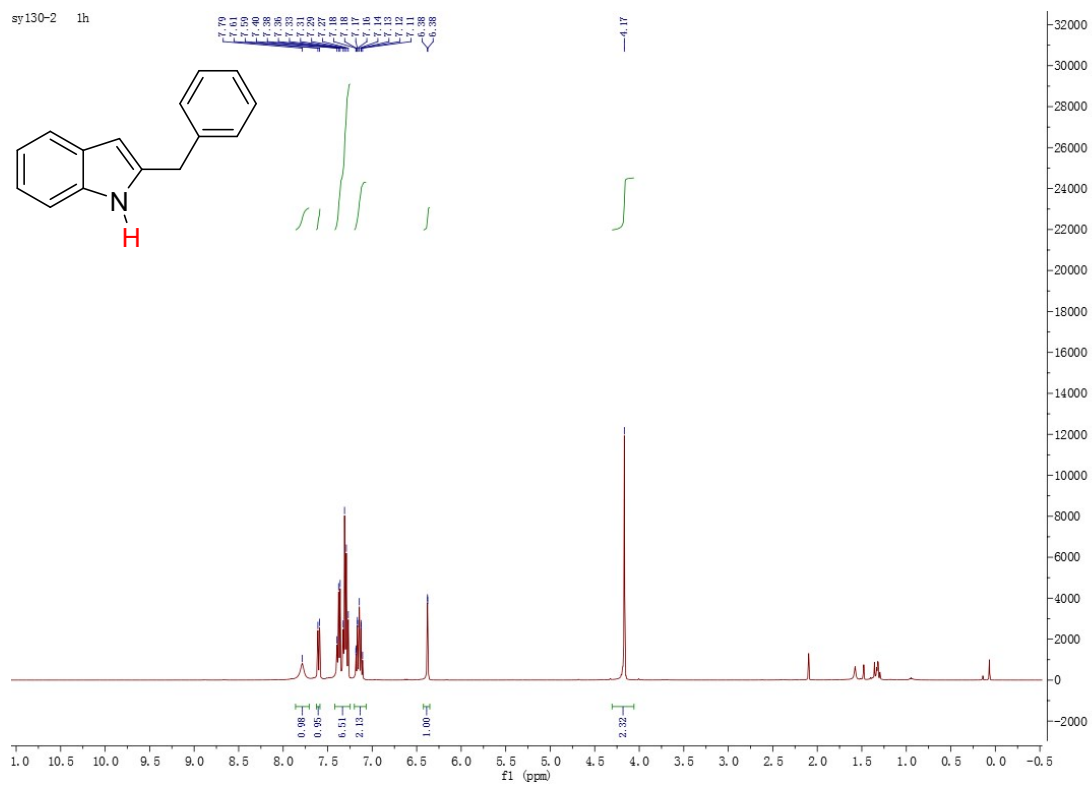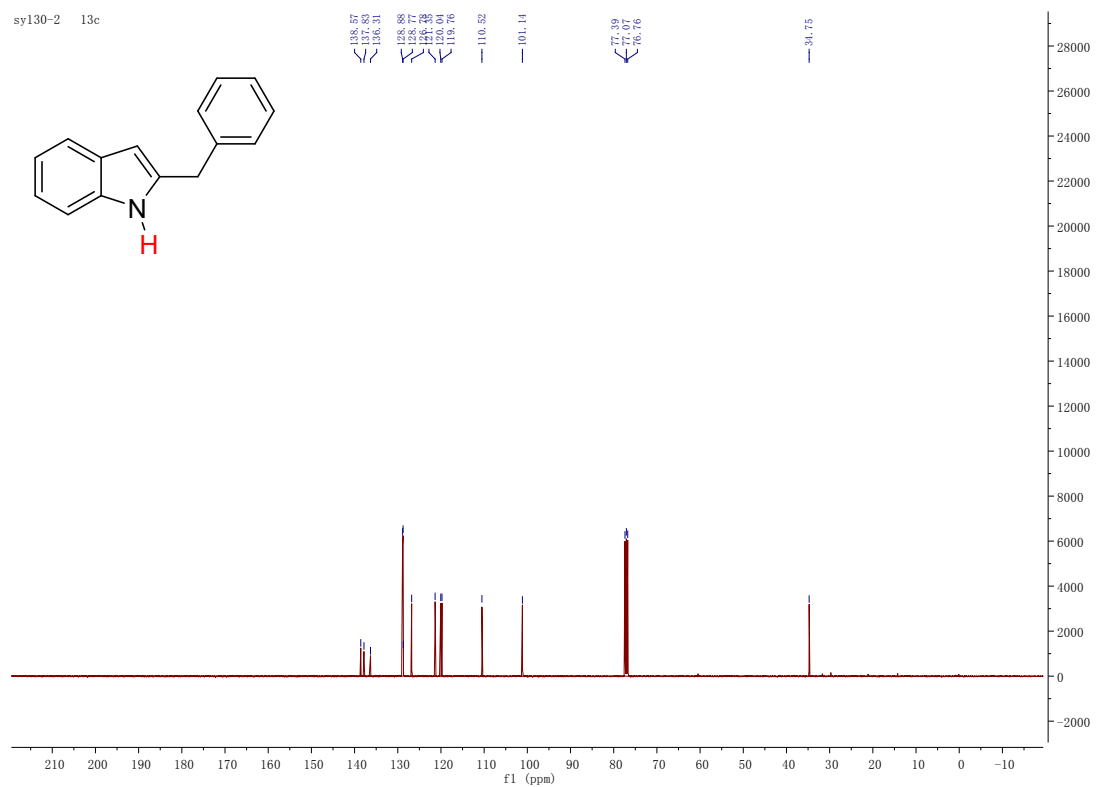

## 7 X-Ray crystal data of 3a and the intermediate 2a

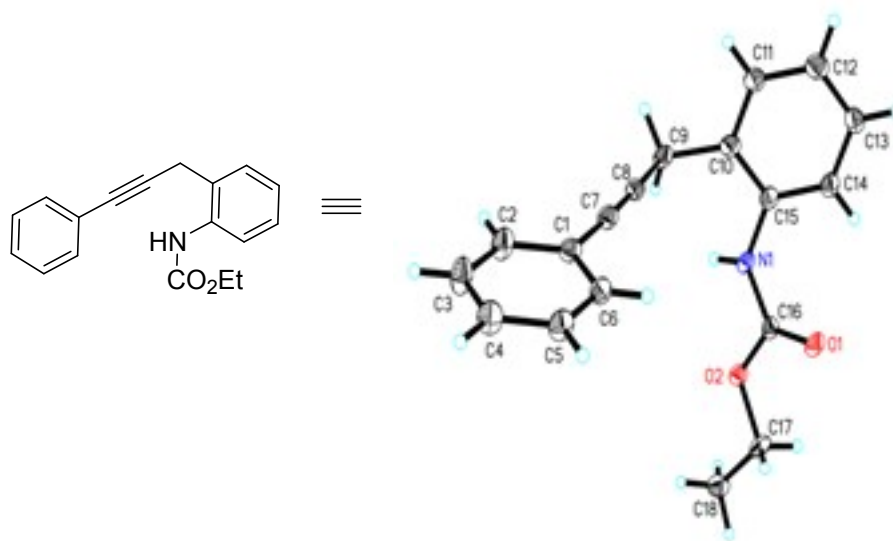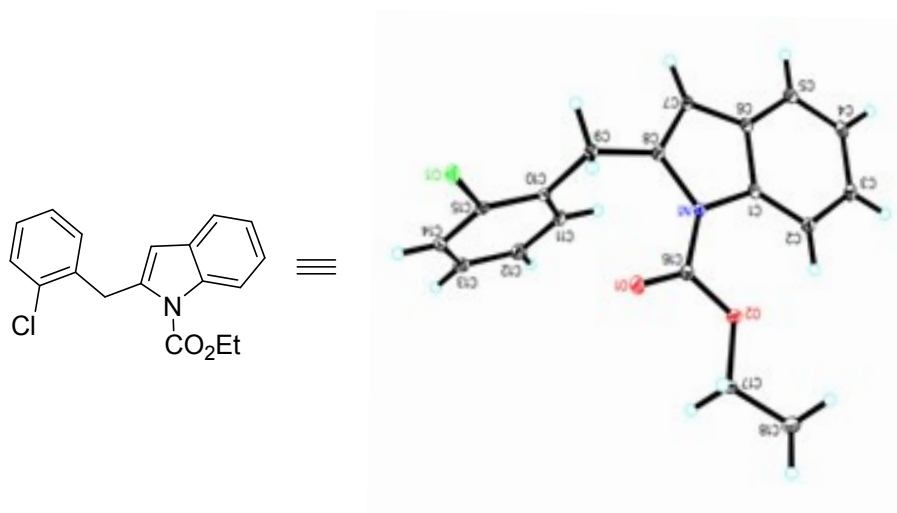

## 8 A Plausible Reaction Mechanism

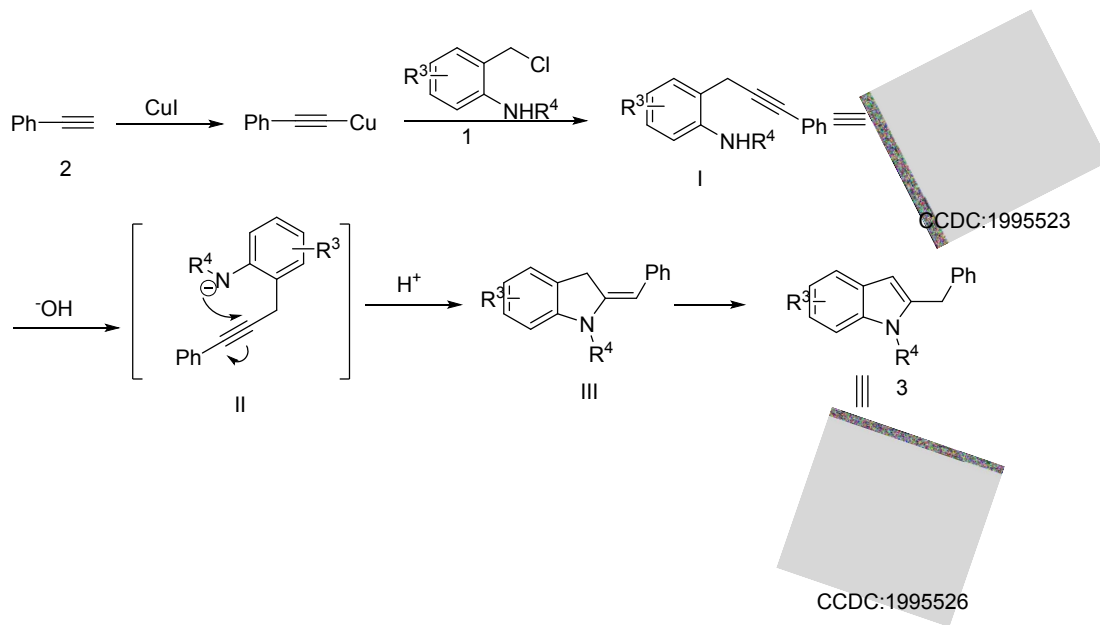

Supplement: d0nj01981j1.pdf [file d0nj01981j1.pdf]
